# Supplementary material for: Computational insights into Diels–Alder reactions of paramagnetic endohedral metallofullerenes: M@C82 (M = Sc, Y, La) and La@C72
Source: Royal Society of Chemistry journal article supplement (doi:10.1039/d4cp02538e), 2024-01-01
Supplement: d4cp02538e1.pdf [file d4cp02538e1.pdf]

## Supporting Information

# Computational Insights into Diels-Alder Reactions of Paramagnetic Endohedral Metallofullerenes: $M@C_{82}$ ( $M = Sc, Y, La$ ) and $La@C_{72}$

*Linfeng Nie,<sup>2</sup> Yuanyuan Sun,<sup>1,2</sup> and Yang Wang<sup>2</sup>*

<sup>1</sup>Institute of Innovation Materials and Energy, Yangzhou University, Yangzhou 225002, P. R. China.

<sup>2</sup>School of Chemistry and Chemical Engineering, Yangzhou University, Yangzhou 225002, P. R. China.

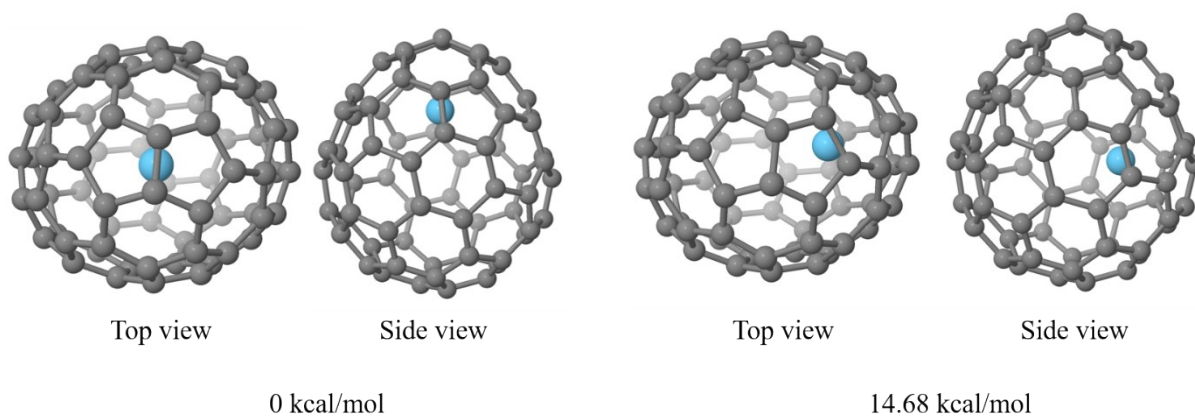

**Figure S1.** Geometrical structures of La@C<sub>2</sub>-C<sub>72</sub> isomers with different La atom positions.

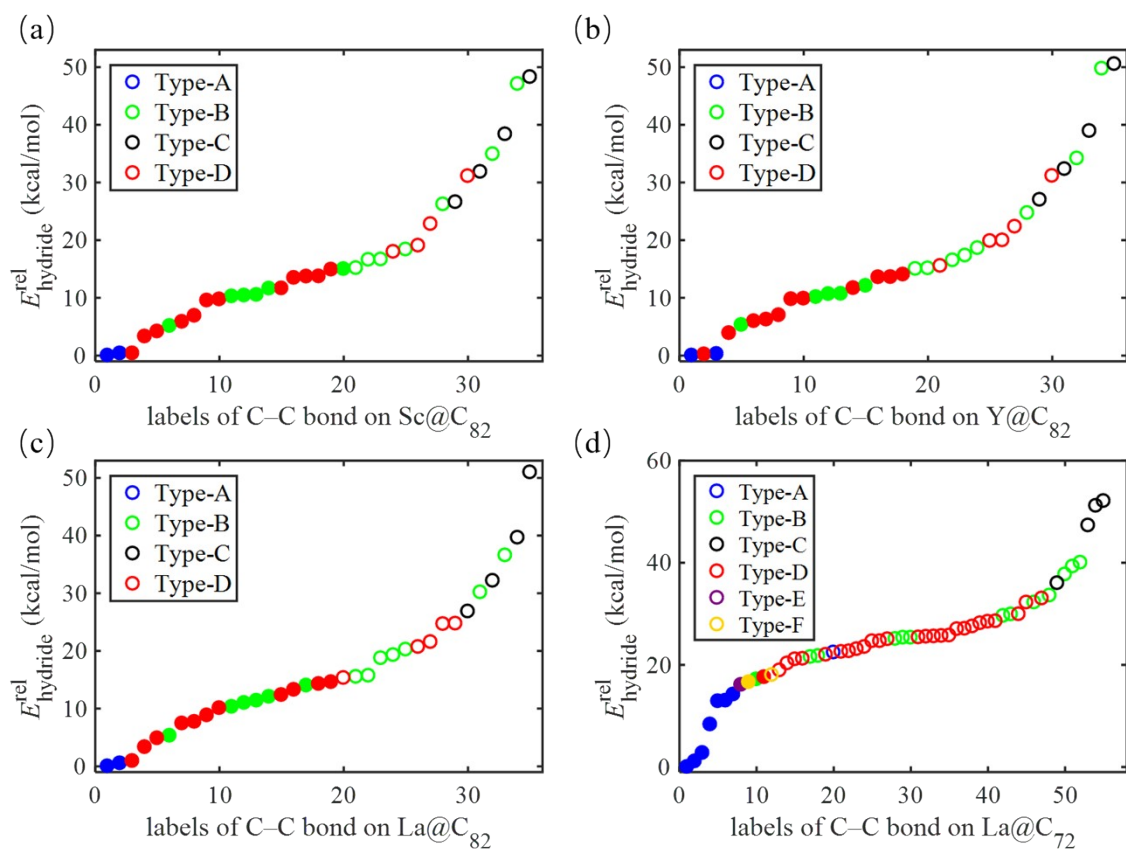

**Figure S2.** Relative energies of dihydrides for (a)  $\text{Sc}@C_{82}$ , (b)  $\text{Y}@C_{82}$ , (c)  $\text{La}@C_{82}$ , and (d)  $\text{La}@C_{72}$ . The relative energies are given in kcal/mol.

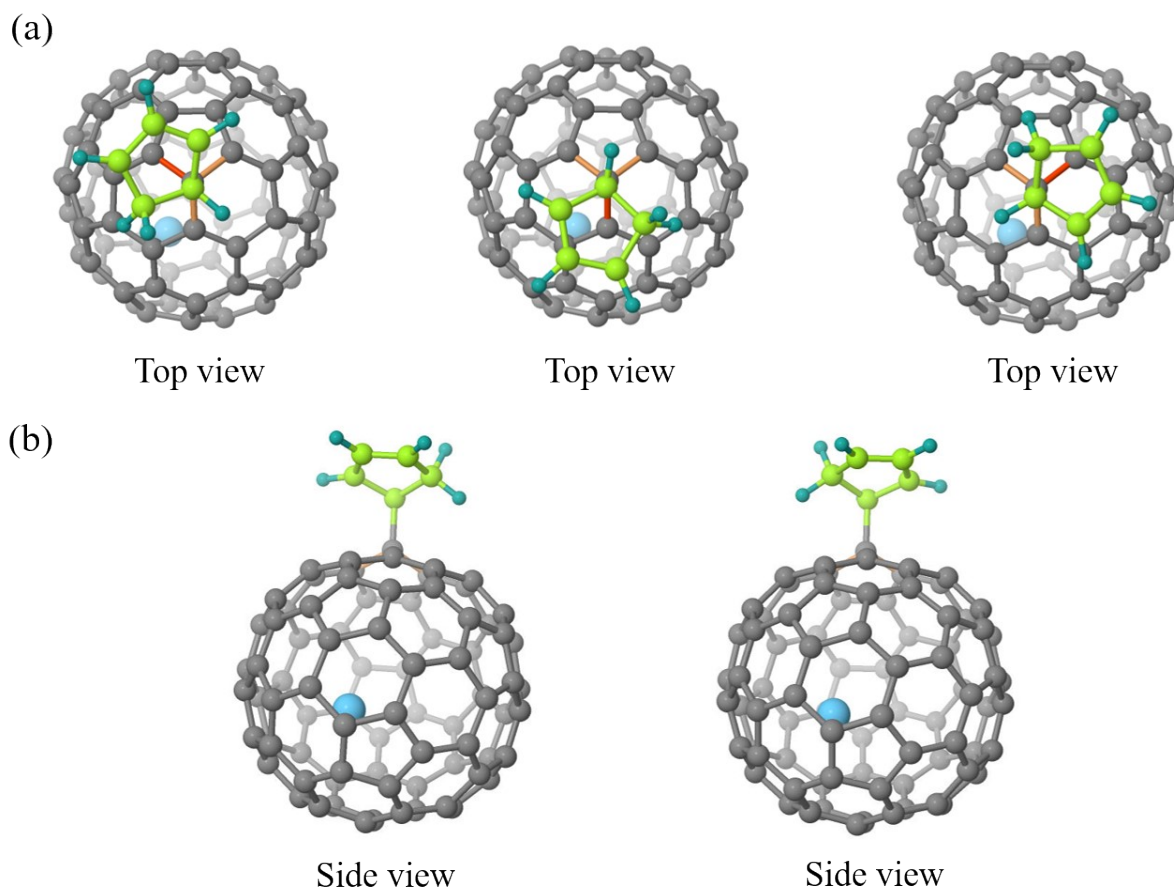

**Figure S3.** (a) Three intermediate conformers for Cp addition to  $C_\alpha$  of  $M@C_{82}$  ( $M = \text{Sc}, \text{Y},$  and  $\text{La}$ ) resulting from C-C single bond rotation. (b) Intermediate conformers for Cp addition to  $C_\alpha$  of  $M@C_{82}$  ( $M = \text{Sc}, \text{Y},$  and  $\text{La}$ ) with mirror orientations.

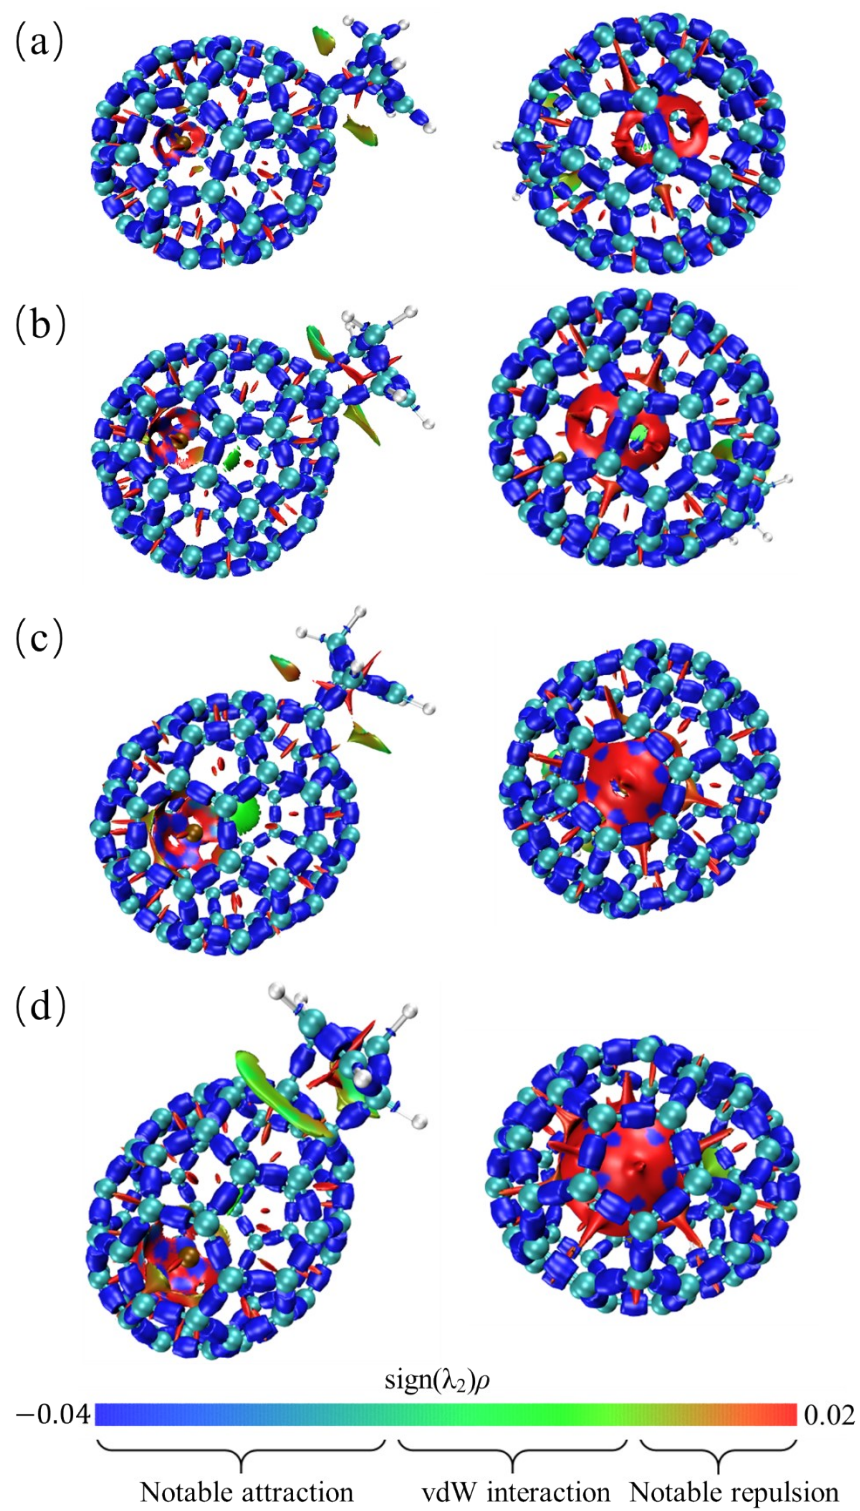

**Figure S4.** BP86/Def2-svp~SDD calculated isosurface of IRI = 1.0 with  $\text{sign}(\lambda_2)\rho$  mapped on the isosurface for Cp adducts with (a) Sc@C<sub>82</sub>, (b) Y@C<sub>82</sub>, (c) La@C<sub>82</sub>, and (d) La@C<sub>72</sub>.

**Table S1.** Relative energies (in kcal/mol, with isomer **a** as reference) and net charges of M by Mulliken population and Natural Population Analysis of M@C<sub>82</sub> (M = Sc, Y, and La) isomers.

| Isomer   | Sc@C <sub>82</sub> |          |      | Y@C <sub>82</sub> |          |      | La@C <sub>82</sub> |          |      |
|----------|--------------------|----------|------|-------------------|----------|------|--------------------|----------|------|
|          | $\Delta E$         | Mulliken | NBA  | $\Delta E$        | Mulliken | NBA  | $\Delta E$         | Mulliken | NBA  |
| <b>a</b> | 0.0                | 0.50     | 0.73 | 0.0               | 1.14     | 1.03 | 0.0                | 0.48     | 0.89 |
| <b>b</b> | 0.4                | 0.50     | 0.73 | -                 | -        | -    | 0.9                | 0.46     | 0.89 |
| <b>c</b> | 4.1                | 0.50     | 0.73 | -                 | -        | -    | -                  | -        | -    |
| <b>d</b> | 11.0               | 0.51     | 0.74 | -                 | -        | -    | -                  | -        | -    |
| <b>e</b> | 12.7               | 0.49     | 0.72 | 13.8              | 1.15     | 1.04 | 14.6               | 0.51     | 0.89 |
| <b>f</b> | 26.7               | 0.49     | 0.74 | 28.5              | 1.15     | 1.04 | 28.6               | 0.50     | 0.89 |

\*The hyphen (-) indicates that no stable isomer was found.

**Table S2.** Gibbs free energy barriers ( $\Delta G^\ddagger$ ) and reaction energies ( $\Delta G_R$ ) for the reaction of Cp with M@C<sub>82</sub> (M = Sc, Y, and La) and La@C<sub>72</sub> in gas-phase, toluene, and *o*-DCB. All the energies are given in kcal/mol.

| EMFs               | mechanism | type | No. C-C | $\Delta G^\ddagger$ ( $\Delta G_R$ ) | $\Delta G^\ddagger$ ( $\Delta G_R$ ) | $\Delta G^\ddagger$ ( $\Delta G_R$ ) |
|--------------------|-----------|------|---------|--------------------------------------|--------------------------------------|--------------------------------------|
|                    |           |      |         | gas                                  | toluene                              | <i>o</i> -DCB                        |
| Sc@C <sub>82</sub> | stepwise  | B    | 7-13    | 11.4, 11.3 (0.6)                     | 15.0, 14.9 (5.6)                     | 14.8, 14.7 (4.7)                     |
|                    |           | C    | 13-6    | 22.1, 26.2 (18.4)                    | 24.9, 29.4 (22.3)                    | 24.9, 29.3 (21.7)                    |
|                    |           | D    | 7-14    | 14.3, 15.2 (4.6)                     | 17.3, 18.5 (9.4)                     | 17.3, 18.3 (8.2)                     |
|                    | concerted | A    | 1-3     | 12.4 (-2.4)                          | 14.8 (3.3)                           | 15.3 (2.1)                           |
|                    |           | B    | 45-46   | 15.7 (-1.1)                          | 20.2 (6.2)                           | 19.1 (4.1)                           |
|                    |           | D    | 8-15    | 12.1 (-5.8)                          | 16.5 (-0.4)                          | 16.2 (-1.3)                          |
| Y@C <sub>82</sub>  | stepwise  | B    | 7-13    | 10.3, 10.2 (-0.9)                    | 15.3, 14.8 (5.5)                     | 14.9, 14.3 (4.2)                     |
|                    |           | C    | 13-22   | 19.1, 22.5 (13.7)                    | 24.1, 28.7 (20.4)                    | 23.3, 27.4 (19.0)                    |
|                    |           | D    | 7-14    | 12.7, 13.5 (0.5)                     | 17.6, 18.5 (7.0)                     | 17.2, 18.1 (5.1)                     |
|                    | concerted | A    | 1-3     | 11.0 (-3.9)                          | 15.7 (2.1)                           | 16.0 (1.8)                           |
|                    |           | B    | 45-46   | 13.9 (-3.0)                          | 21.1 (6.0)                           | 19.3 (3.8)                           |
|                    |           | D    | 8-15    | 10.8 (-7.2)                          | 16.2 (-1.6)                          | 15.6 (-2.3)                          |
| La@C <sub>82</sub> | stepwise  | B    | 7-13    | 11.5, 11.7 (1.0)                     | 10.5, 9.0 (-0.5)                     | 11.9, 11.2 (1.1)                     |
|                    |           | C    | 13-22   | 22.0, 27.0 (16.5)                    | 21.3, 25.2 (17.7)                    | 22.6, 27.0 (18.3)                    |
|                    |           | D    | 7-14    | 14.5, 14.2 (3.3)                     | 11.3, 12.7 (3.5)                     | 13.8, 14.3 (3.8)                     |
|                    | concerted | A    | 1-3     | 11.2 (-4.0)                          | 13.0 (-2.4)                          | 13.5 (-2.0)                          |
|                    |           | B    | 45-46   | 16.5 (0.1)                           | 16.9 (3.1)                           | 17.1 (3.1)                           |
|                    |           | D    | 8-15    | 12.4 (-5.7)                          | 12.4 (-5.9)                          | 13.3 (-5.1)                          |
| La@C <sub>72</sub> | stepwise  | A    | 33-7    | 12.3, 13.2 (2.7)                     | 15.4, 16.9 (3.8)                     | 16.3, 17.2 (5.7)                     |
|                    |           | B    | 4-5     | 13.8, 15.1 (3.4)                     | 17.2, 19.4 (10.0)                    | 17.9, 19.2 (9.0)                     |
|                    |           | C    | 31-9    | 17.0, 19.9 (10.7)                    | 20.7, 23.9 (15.3)                    | 20.9, 23.3 (15.2)                    |
|                    |           | D    | 33-32   | 12.3, 10.6 (-2.6)                    | 16.9, 16.2 (3.1)                     | 16.6, 15.0 (2.0)                     |
|                    | concerted | F    | 33-34   | 13.1, 11.9 (-1.8)                    | 15.9, 17.0 (2.7)                     | 16.7, 16.2 (2.5)                     |
|                    |           | A    | 61-62   | 8.4 (-11.4)                          | 11.6 (-7.1)                          | 11.7 (-7.4)                          |
|                    |           | B    | 3-37    | 14.7 (-1.0)                          | 18.7 (4.0)                           | 18.5 (3.6)                           |
|                    |           | E    | 34-47   | 14.5 (-8.5)                          | 18.0 (-8.9)                          | 18.3 (-6.1)                          |
|                    |           | F    | 34-45   | 14.0 (-3.4)                          | 18.2 (0.4)                           | 18.0 (0.8)                           |

## Cartesian coordinates for most important structures

In the following sections, the DFT optimized Cartesian coordinates of the reactants, reactant complexes (RC), intermediates (INT), transition states (TS) and products (P) for the most important reaction pathways studied in this work are presented.

The total energy in units of Hartree, atomic coordinates in Å, the lowest vibrational frequency ( $\tilde{\nu}$ ) in  $\text{cm}^{-1}$ , and the number of imaginary frequencies (denoted by NIMAG) are provided for each of the structures below.

### 1. Sc@C<sub>2v</sub>-C<sub>82</sub>

Energy = -3883.77785224

NIMAG = 0  $\tilde{\nu}$  = 46.72

|   |           |           |           |   |           |           |           |
|---|-----------|-----------|-----------|---|-----------|-----------|-----------|
| C | 1.121244  | -3.275232 | -2.397511 | C | 1.121244  | -3.275232 | -2.397511 |
| C | 2.281805  | -1.253551 | -3.119396 | C | 2.281805  | -1.253551 | -3.119396 |
| C | 1.100960  | 0.652776  | -3.789493 | C | 1.100960  | 0.652776  | -3.789493 |
| C | -0.009100 | 2.710437  | -3.105358 | C | -0.009100 | 2.710437  | -3.105358 |
| C | -3.575029 | -0.715620 | -2.411068 | C | -0.666183 | 3.986324  | -1.221797 |
| C | -2.538985 | -1.446790 | -3.107764 | C | -1.419029 | 3.938236  | -0.000435 |
| C | -3.563500 | 0.669557  | -2.412074 | C | -3.186822 | 2.639790  | 1.212508  |
| C | -3.965349 | -1.450861 | -1.211773 | C | -3.565055 | 0.669623  | 2.409926  |
| C | -2.411016 | -2.714970 | -2.415083 | C | -2.540988 | -1.446697 | 3.106335  |
| C | -1.405680 | -0.781806 | -3.677530 | C | -2.412568 | -2.714908 | 2.413761  |
| C | -2.513219 | 1.379748  | -3.108516 | C | -0.745268 | -4.093559 | 1.219382  |
| C | -3.939512 | 1.412343  | -1.212441 | C | 1.434506  | -3.967343 | 0.000612  |
| C | -4.276387 | -0.754752 | -0.001284 | C | 2.292092  | -2.466262 | -2.359990 |
| C | -3.237139 | -2.693416 | -1.213728 | C | 3.031983  | -0.088971 | -2.678460 |
| C | -1.199019 | -3.394069 | -2.408918 | C | 2.303908  | 1.091138  | -3.134048 |
| C | -0.138329 | -1.529101 | -3.706348 | C | 1.186317  | 3.128330  | -2.398286 |
| C | -1.392635 | 0.691864  | -3.678910 | C | 0.771869  | 3.891541  | -1.224090 |
| C | -2.360494 | 2.644799  | -2.417247 | C | -0.666971 | 3.986318  | 1.221389  |
| C | -3.186037 | 2.639755  | -1.214482 | C | -2.362055 | 2.644865  | 2.415798  |
| C | -4.262520 | 0.722630  | -0.001301 | C | -2.515225 | 1.379823  | 3.107018  |
| C | -3.966120 | -1.450828 | 1.209421  | C | -1.408059 | -0.781707 | 3.676821  |
| C | -2.784677 | -3.312085 | -0.000773 | C | -1.200576 | -3.393993 | 2.408409  |
| C | -0.744482 | -4.093607 | -1.219581 | C | 0.694254  | -4.033963 | 1.223737  |
| C | -0.061406 | -2.828568 | -3.101178 | C | 2.660140  | -3.204849 | 0.001002  |
| C | 1.087774  | -0.793927 | -3.780945 | C | 3.098512  | -2.484705 | -1.165875 |
| C | -0.112112 | 1.413466  | -3.709878 | C | 3.860402  | -0.095851 | -1.500810 |
| C | -1.134056 | 3.299423  | -2.412924 | C | 2.339542  | 2.297403  | -2.372044 |
| C | -2.721591 | 3.247190  | -0.000846 | C | 1.499702  | 3.800355  | 0.000492  |
| C | -3.940287 | 1.412372  | 1.210021  | C | 0.771092  | 3.891507  | 1.224615  |
| C | -3.576581 | -0.715558 | 2.408955  | C | -1.135618 | 3.299465  | 2.412239  |
| C | -3.237918 | -2.693382 | 1.211876  | C | -1.395015 | 0.691954  | 3.678153  |
| C | -1.498878 | -4.032145 | -0.000340 | C | -0.140708 | -1.529001 | 3.706539  |
| C | 0.695044  | -4.034036 | -1.222991 | C | -0.063401 | -2.828488 | 3.101416  |



C 1.119675 -3.275111 2.398522  
 C 3.097704 -2.484656 1.168188  
 C 3.852789 -1.322209 -0.732227  
 C 3.984157 1.152426 -0.742218  
 C 3.144376 2.271045 -1.162175  
 C 2.688697 2.981898 0.000857  
 C 1.184730 3.128283 2.399073  
 C -0.011100 2.710487 3.105417  
 C -0.114494 1.413538 3.709946  
 C 1.085326 -0.793861 3.782035  
 C 2.290606 -2.466172 2.361830  
 C 3.852125 -1.322211 0.734948  
 C 3.983160 1.152292 0.744780  
 C 3.143319 2.270904 1.164185  
 C 2.337939 2.297296 2.373605  
 C 1.098500 0.652861 3.790482  
 C 2.279867 -1.253512 3.121327  
 C 3.858650 -0.095838 1.503350  
 C 2.301912 1.091163 3.135793  
 C 3.030388 -0.088951 2.681016  
 Sc 2.134755 0.250815 -0.001084

C -3.967540 -1.450597 1.209466  
 C -2.784007 -3.310249 -0.000767  
 C -0.742741 -4.090080 -1.219613  
 C -0.060516 -2.825511 -3.101233  
 C 1.088364 -0.789749 -3.782697  
 C -0.113029 1.416269 -3.709034  
 C -1.136486 3.301394 -2.411890  
 C -2.724317 3.248088 -0.000838  
 C -3.942888 1.412586 1.209968  
 C -3.577516 -0.714963 2.408824  
 C -3.237908 -2.692297 1.211898  
 C -1.496990 -4.028985 -0.000334  
 C 0.697391 -4.031380 -1.223446  
 C 1.123560 -3.272760 -2.398088  
 C 2.283825 -1.250943 -3.122673  
 C 1.100558 0.655970 -3.789949  
 C -0.011106 2.714136 -3.104943  
 C -0.669540 3.989377 -1.221685  
 C -1.422537 3.940967 -0.000423  
 C -3.189505 2.640313 1.212422  
 C -3.566622 0.670113 2.409616  
 C -2.541567 -1.445912 3.106066  
 C -2.412596 -2.713338 2.414256  
 C -0.743535 -4.090037 1.219434  
 C 1.436126 -3.964111 0.000626  
 C 2.295277 -2.464598 -2.362995  
 C 3.034189 -0.084252 -2.681840  
 C 2.305729 1.097217 -3.134828  
 C 1.184695 3.136184 -2.399974  
 C 0.769847 3.899973 -1.224930  
 C -0.670334 3.989383 1.221316  
 C -2.364665 2.645851 2.415510  
 C -2.516800 1.381362 3.106291  
 C -1.408023 -0.779660 3.675983  
 C -1.199264 -3.391083 2.408152  
 C 0.696592 -4.031327 1.224216  
 C 2.662918 -3.202271 0.001019  
 C 3.103139 -2.482798 -1.166726  
 C 3.863383 -0.091934 -1.503472  
 C 2.341985 2.308444 -2.375944  
 C 1.497933 3.810431 0.000527  
 C 0.769057 3.899970 1.225512  
 C -1.138059 3.301441 2.411238

## 2. $Y@C_{2v}-C_{82}$

Energy = -3161.44684655

NIMAG = 0  $\tilde{\nu} = 50.50$

C -3.575945 -0.715026 -2.410933  
 C -2.539540 -1.446000 -3.107483  
 C -3.565051 0.670047 -2.411757  
 C -3.966757 -1.450630 -1.211816  
 C -2.411022 -2.713399 -2.415561  
 C -1.405621 -0.779760 -3.676679  
 C -2.514774 1.381284 -3.107771  
 C -3.942105 1.412557 -1.212382  
 C -4.278115 -0.754748 -0.001284  
 C -3.237119 -2.692330 -1.213741  
 C -1.197692 -3.391155 -2.408645  
 C -0.138341 -1.526243 -3.705961  
 C -1.393120 0.693658 -3.677701  
 C -2.363088 2.645785 -2.416936  
 C -3.188714 2.640280 -1.214382  
 C -4.265044 0.722784 -0.001301

C -1.395521 0.693752 3.676966  
 C -0.140752 -1.526140 3.706141  
 C -0.062536 -2.825425 3.101476  
 C 1.121984 -3.272662 2.399121  
 C 3.102358 -2.482762 1.169061  
 C 3.860145 -1.321304 -0.734130  
 C 3.970004 1.157260 -0.741877  
 C 3.148785 2.287849 -1.165661  
 C 2.692773 2.996848 0.000914  
 C 1.183112 3.136197 2.400840  
 C -0.013126 2.714202 3.105045  
 C -0.115437 1.416352 3.709131  
 C 1.085888 -0.789666 3.783723  
 C 2.293751 -2.464513 2.364821  
 C 3.859561 -1.321299 0.736909  
 C 3.969244 1.157204 0.744571  
 C 3.147839 2.287762 1.167792  
 C 2.340399 2.308420 2.377601  
 C 1.098082 0.656067 3.790922  
 C 2.281805 -1.250876 3.124506  
 C 3.861918 -0.091900 1.506114  
 C 2.303696 1.097280 3.136579  
 C 3.032462 -0.084198 2.684215  
 Y 1.941488 0.214146 -0.000438

### 3. La@C<sub>2v</sub>-C<sub>82</sub>

Energy = -3560.36418947

NIMAG = 0  $\tilde{\nu}$  = 39.25

C 3.610723 0.693927 -2.410984  
 C 2.567477 1.415058 -3.108130  
 C 3.611196 -0.691525 -2.410984  
 C 3.994745 1.433559 -1.211418  
 C 2.427162 2.681616 -2.416762  
 C 1.439813 0.737457 -3.679468  
 C 2.568455 -1.413379 -3.108136  
 C 3.995735 -1.430899 -1.211424  
 C 4.312957 0.740705 -0.000322  
 C 3.253000 2.668695 -1.213723  
 C 1.206541 3.348164 -2.411018  
 C 0.164808 1.471417 -3.707680  
 C 1.440321 -0.736558 -3.679470

C 2.429020 -2.680037 -2.416773  
 C 3.254853 -2.666551 -1.213736  
 C 4.313467 -0.737829 -0.000325  
 C 3.994945 1.433553 1.210830  
 C 2.794696 3.283196 -0.000190  
 C 0.745162 4.042172 -1.221181  
 C 0.074790 2.770469 -3.103820  
 C -1.055836 0.721989 -3.784383  
 C 0.165825 -1.471406 -3.707687  
 C 1.208865 -3.347432 -2.411030  
 C 2.796973 -3.281377 -0.000207  
 C 3.995935 -1.430904 1.210822  
 C 3.611124 0.693914 2.410459  
 C 3.253202 2.668688 1.213265  
 C 1.499212 3.988822 -0.000079  
 C -0.695079 3.964959 -1.224519  
 C -1.116104 3.203499 -2.399451  
 C -2.259221 1.171617 -3.127916  
 C -1.055342 -0.722830 -3.784382  
 C 0.076712 -2.770521 -3.103828  
 C 0.747966 -4.041773 -1.221199  
 C 1.501984 -3.987908 -0.000100  
 C 3.255055 -2.666557 1.213250  
 C 3.611597 -0.691537 2.410451  
 C 2.567995 1.415040 3.107781  
 C 2.427565 2.681604 2.416442  
 C 0.745366 4.042162 1.221147  
 C -1.428021 3.884216 0.000165  
 C -2.281310 2.384545 -2.369763  
 C -3.004458 -0.001100 -2.682719  
 C -2.258417 -1.173299 -3.127923  
 C -1.113873 -3.204384 -2.399461  
 C -0.692326 -3.965569 -1.224538  
 C 0.748170 -4.041774 1.221123  
 C 2.429423 -2.680050 2.416424  
 C 2.568973 -1.413393 3.107772  
 C 1.440427 0.737437 3.679306  
 C 1.206944 3.348148 2.410904  
 C -0.694874 3.964946 1.224726  
 C -2.635664 3.090694 0.000262  
 C -3.083411 2.375338 -1.163336  
 C -3.842580 -0.001392 -1.508360  
 C -2.279647 -2.386240 -2.369757

C -1.425340 -3.885348 0.000145  
 C -0.692122 -3.965568 1.224704  
 C 1.209268 -3.347440 2.410881  
 C 1.440935 -0.736577 3.679300  
 C 0.165425 1.471396 3.707743  
 C 0.075309 2.770450 3.103894  
 C -1.115698 3.203476 2.399724  
 C -3.083191 2.375317 1.163934  
 C -3.883665 1.237049 -0.738772  
 C -3.882649 -1.239821 -0.738765  
 C -3.081738 -2.377624 -1.163345  
 C -2.633570 -3.092735 0.000246  
 C -1.113467 -3.204385 2.399701  
 C 0.077230 -2.770534 3.103874  
 C 0.166442 -1.471423 3.707735  
 C -1.055204 0.721973 3.784665  
 C -2.280909 2.384520 2.370237  
 C -3.883495 1.237037 0.739496  
 C -3.882479 -1.239816 0.739476  
 C -3.081519 -2.377615 1.163917  
 C -2.279246 -2.386240 2.370206  
 C -1.054710 -0.722852 3.784656  
 C -2.258704 1.171608 3.128409  
 C -3.842220 -0.001400 1.509058  
 C -2.257900 -1.173322 3.128404  
 C -3.003994 -0.001113 2.683324  
 La -1.769848 -0.000142 -0.000080

#### 4. La@C<sub>2</sub>-C<sub>72</sub>

Energy = -3177.91691911

NIMAG = 0  $\tilde{v}$  = 59.85

C -3.936981 0.784569 -0.470416  
 C -3.955971 -0.428863 0.254416  
 C -3.453097 -0.480996 1.606710  
 C -2.788052 -1.777936 1.780269  
 C -1.753036 -1.960963 2.747202  
 C -0.631299 -2.788416 2.347349  
 C 0.726483 -2.500256 2.793618  
 C 1.627941 -2.751422 1.699163  
 C 2.777886 -1.912751 1.446514  
 C 3.276641 -1.937388 0.108427

C 3.936981 -0.784569 -0.470416  
 C 3.685355 -0.774677 -1.901395  
 C 3.414419 0.440737 -2.570806  
 C 2.429464 0.480608 -3.640471  
 C 1.679967 1.725892 -3.499949  
 C 0.336089 1.791297 -3.873703  
 C -0.611018 2.525156 -3.053073  
 C -1.915187 1.905663 -3.234540  
 C -2.870814 1.944531 -2.207214  
 C -3.685355 0.774677 -1.901395  
 C -3.276641 1.937388 0.108427  
 C -2.558314 2.620911 -0.970094  
 C -1.259552 3.179459 -0.756845  
 C -0.221886 3.084459 -1.794756  
 C 1.200838 3.031599 -1.404005  
 C 2.130824 2.401101 -2.294462  
 C 3.280190 1.664793 -1.794296  
 C 3.567979 1.658844 -0.420090  
 C 3.955971 0.428863 0.254416  
 C 3.453097 0.480996 1.606710  
 C 2.935863 -0.687731 2.258147  
 C 2.031336 -0.464805 3.378580  
 C 0.979729 -1.427289 3.698791  
 C -0.163341 -0.702312 4.209634  
 C -1.505102 -0.875582 3.677324  
 C -2.031336 0.464805 3.378580  
 C -2.935863 0.687731 2.258147  
 C -2.777886 1.912751 1.446514  
 C -1.627941 2.751422 1.699163  
 C -0.850574 3.305189 0.607414  
 C 0.535919 3.300612 0.990650  
 C 1.570959 3.099538 0.019019  
 C 2.760267 2.439749 0.484492  
 C 2.788052 1.777936 1.780269  
 C 1.753036 1.960963 2.747202  
 C 1.505102 0.875582 3.677324  
 C 0.163341 0.702312 4.209634  
 C -0.979729 1.427289 3.698791  
 C -0.726483 2.500256 2.793618  
 C 0.631299 2.788416 2.347349  
 C -3.567979 -1.658844 -0.420090  
 C -2.760267 -2.439749 0.484492  
 C -1.570959 -3.099538 0.019019

C -0.535919 -3.300612 0.990650  
 C 0.850574 -3.305189 0.607414  
 C 1.259552 -3.179459 -0.756845  
 C 2.558314 -2.620911 -0.970094  
 C 2.870814 -1.944531 -2.207214  
 C 1.915187 -1.905663 -3.234540  
 C 1.737997 -0.689756 -4.018889  
 C 0.338684 -0.616937 -4.416983  
 C -0.338684 0.616937 -4.416983  
 C -1.737997 0.689756 -4.018889  
 C -2.429464 -0.480608 -3.640471  
 C -3.414419 -0.440737 -2.570806  
 C -3.280190 -1.664793 -1.794296  
 C -2.130824 -2.401101 -2.294462  
 C -1.200838 -3.031599 -1.404005  
 C 0.221886 -3.084459 -1.794756  
 C 0.611018 -2.525156 -3.053073  
 C -0.336089 -1.791297 -3.873703  
 C -1.679967 -1.725892 -3.499949  
 La -0.000000 0.000000 1.726732

NIMAG = 0  $\tilde{\nu}$  = 7.13

C -3.610661 -0.695570 -2.340406  
 C -2.583556 -1.418589 -3.059258  
 C -3.599612 0.688879 -2.326291  
 C -3.983116 -1.444009 -1.142766  
 C -2.444835 -2.693321 -2.381409  
 C -1.459083 -0.746843 -3.639530  
 C -2.560925 1.407497 -3.032747  
 C -3.964559 1.422496 -1.115584  
 C -4.274453 -0.759494 0.079612  
 C -3.254094 -2.685040 -1.168183  
 C -1.231767 -3.371035 -2.399680  
 C -0.191717 -1.492071 -3.694085  
 C -1.447484 0.726727 -3.626238  
 C -2.397974 2.664844 -2.327876  
 C -3.209973 2.649139 -1.115409  
 C -4.259939 0.716209 0.095411  
 C -3.949236 -1.468845 1.278818  
 C -2.783129 -3.315982 0.032479  
 C -0.759510 -4.082090 -1.224021  
 C -0.105017 -2.797634 -3.102564  
 C 1.032350 -0.754699 -3.778948  
 C -0.168305 1.450393 -3.668410  
 C -1.173772 3.322077 -2.336721  
 C -2.723754 3.239466 0.099113  
 C -3.929479 1.394698 1.306860  
 C -3.544610 -0.745663 2.479462  
 C -3.219725 -2.711585 1.257724  
 C -1.496343 -4.033851 0.006522  
 C 0.679681 -4.020955 -1.247474  
 C 1.088129 -3.249693 -2.420280  
 C 2.236417 -1.219554 -3.138808  
 C 1.044054 0.692054 -3.773160  
 C -0.058236 2.741151 -3.050941  
 C -0.689297 3.996896 -1.144486  
 C -1.424505 3.933259 0.087474  
 C -3.175951 2.626010 1.311196  
 C -3.533963 0.640279 2.492468  
 C -2.497301 -1.481968 3.153466  
 C -2.377284 -2.743550 2.446801  
 C -0.725188 -4.107362 1.214742  
 C 1.436713 -3.966181 -0.033891

## 5. Cp

Energy = -193.971183286

NIMAG = 0  $\tilde{\nu}$  = 324.34

C 0.062075 0.857039 0.000011  
 H 1.177527 0.894108 0.000029  
 H -0.263829 1.924465 -0.000016  
 C -0.478461 0.100615 -1.186259  
 H -0.284739 0.371248 -2.233697  
 C -1.227813 -0.946744 -0.735652  
 H -1.754807 -1.683544 -1.359988  
 C -0.478499 0.100660 1.186292  
 H -0.284815 0.371333 2.233727  
 C -1.227853 -0.946704 0.735700  
 H -1.754879 -1.683476 1.360044

## 6. RC for Type D [5,6] 8-15 concerted mechanism addition between Sc@C<sub>2v</sub>-C<sub>82</sub> and Cp

Energy = -4077.76382747

C 2.258555 -2.439762 -2.391493  
 C 2.991711 -0.058772 -2.697498  
 C 2.255927 1.125125 -3.129740  
 C 1.146229 3.152956 -2.356190  
 C 0.748119 3.904450 -1.168620  
 C -0.655298 3.973325 1.298994  
 C -2.332764 2.617689 2.501079  
 C -2.474554 1.344845 3.180952  
 C -1.356923 -0.821189 3.714164  
 C -1.164180 -3.420901 2.417330  
 C 0.714381 -4.046422 1.199007  
 C 2.661415 -3.202285 -0.043451  
 C 3.081924 -2.469602 -1.209187  
 C 3.833442 -0.076501 -1.529669  
 C 2.300605 2.322858 -2.355083  
 C 1.493965 3.802135 0.045073  
 C 0.783456 3.880619 1.280294  
 C -1.106560 3.274649 2.488712  
 C -1.345423 0.652542 3.729512  
 C -0.088681 -1.567074 3.717946  
 C -0.018265 -2.860839 3.099361  
 C 1.155555 -3.298922 2.375050  
 C 3.114990 -2.493381 1.124591  
 C 3.839591 -1.310505 -0.774181  
 C 3.968084 1.163748 -0.760176  
 C 3.121836 2.285452 -1.156720  
 C 2.683405 2.984776 0.019914  
 C 1.214087 3.105772 2.440503  
 C 0.027996 2.679010 3.158961  
 C -0.065519 1.375440 3.751028  
 C 1.137515 -0.831058 3.782830  
 C 2.324591 -2.488011 2.329585  
 C 3.861529 -1.325342 0.692659  
 C 3.992435 1.149639 0.726622  
 C 3.156569 2.263083 1.169374  
 C 2.367645 2.276234 2.390096  
 C 1.149430 0.615458 3.806342  
 C 2.323013 -1.282614 3.100725  
 C 3.880714 -0.106831 1.474062  
 C 2.343265 1.062034 3.139823  
 C 3.065808 -0.112774 2.661363  
 Sc 2.132483 0.254646 0.011892  
 C -5.861039 3.415149 -2.928734

C -5.379214 4.567012 -2.088791  
 C -5.856909 4.416650 -0.815160  
 C -6.624209 2.558983 -1.954317  
 C -6.628275 3.175499 -0.732132  
 H -6.519637 3.767355 -3.758868  
 H -5.031834 2.868300 -3.433732  
 H -4.760802 5.392650 -2.466694  
 H -5.678837 5.099746 0.027786  
 H -7.112626 1.609941 -2.214368  
 H -7.109462 2.798107 0.181619

## 7. TS for Type D [5,6] 8-15 concerted mechanism addition between Sc@C<sub>2v</sub>-C<sub>82</sub> and Cp

Energy = -4077.75205633

NIMAG = 1  $\tilde{\nu}$  = -415.30

C -2.802194 -1.032917 -2.192774  
 C -1.767531 -1.761544 -2.895930  
 C -2.797954 0.348505 -2.191157  
 C -3.196604 -1.789681 -1.001925  
 C -1.642342 -3.035810 -2.219435  
 C -0.635642 -1.099977 -3.473721  
 C -1.734760 1.047122 -2.860636  
 C -3.309306 1.144153 -1.025506  
 C -3.475027 -1.093253 0.216403  
 C -2.467793 -3.025793 -1.015705  
 C -0.432019 -3.719552 -2.226504  
 C 0.627874 -1.850773 -3.520109  
 C -0.617979 0.367468 -3.458364  
 C -1.571528 2.305784 -2.163763  
 C -2.430797 2.343106 -0.995450  
 C -3.451996 0.371668 0.229350  
 C -3.170216 -1.804678 1.421891  
 C -2.004690 -3.658533 0.192342  
 C 0.027742 -4.432372 -1.046604  
 C 0.703671 -3.153571 -2.921726  
 C 1.854818 -1.117274 -3.595090  
 C 0.661243 1.088916 -3.498398  
 C -0.347914 2.967181 -2.180526  
 C -1.923791 2.901539 0.230838  
 C -3.135193 1.046410 1.422148

C -2.777185 -1.082328 2.620494  
 C -2.448044 -3.053571 1.411739  
 C -0.719063 -4.378019 0.177731  
 C 1.466906 -4.375212 -1.057694  
 C 1.889307 -3.609345 -2.229708  
 C 3.051683 -1.584975 -2.942875  
 C 1.872309 0.328952 -3.596102  
 C 0.769449 2.381053 -2.883318  
 C 0.128940 3.646535 -0.991837  
 C -0.618706 3.586355 0.231792  
 C -2.389118 2.300446 1.438676  
 C -2.756950 0.304168 2.618492  
 C -1.739824 -1.818114 3.308966  
 C -1.617777 -3.084113 2.609336  
 C 0.042210 -4.451783 1.393063  
 C 2.214592 -4.319135 0.162108  
 C 3.062097 -2.803407 -2.192503  
 C 3.806640 -0.425509 -2.498032  
 C 3.080512 0.759847 -2.942074  
 C 1.970784 2.794414 -2.183379  
 C 1.567769 3.553631 -1.004701  
 C 0.138846 3.631211 1.449883  
 C -1.559098 2.288038 2.630066  
 C -1.705555 1.012612 3.309199  
 C -0.601951 -1.154443 3.871489  
 C -0.404598 -3.762104 2.590746  
 C 1.481975 -4.393855 1.389012  
 C 3.441975 -3.559427 0.160729  
 C 3.876267 -2.832706 -1.003417  
 C 4.641406 -0.442372 -1.324350  
 C 3.123471 1.959393 -2.171101  
 C 2.301642 3.451830 0.217115  
 C 1.581101 3.537372 1.445269  
 C -0.326453 2.942356 2.634704  
 C -0.585417 0.320039 3.876110  
 C 0.663651 -1.903228 3.891291  
 C 0.736683 -3.200987 3.279839  
 C 1.915430 -3.644015 2.567205  
 C 3.887589 -2.848318 1.330922  
 C 4.633440 -1.674412 -0.565189  
 C 4.774938 0.800464 -0.558771  
 C 3.935503 1.924424 -0.966630  
 C 3.488072 2.629085 0.204304

C 1.994940 2.764130 2.609130  
 C 0.797822 2.343380 3.316263  
 C 0.695880 1.040662 3.910037  
 C 1.890328 -1.169124 3.962854  
 C 3.086427 -2.836064 2.528779  
 C 4.640619 -1.684490 0.901703  
 C 4.782099 0.790243 0.928667  
 C 3.946722 1.909022 1.360330  
 C 3.145946 1.928833 2.572705  
 C 1.907100 0.277609 3.982453  
 C 3.081365 -1.627458 3.295090  
 C 4.655961 -0.462741 1.678225  
 C 3.109737 0.717359 3.326063  
 C 3.832042 -0.461565 2.859107  
 Sc 2.925682 -0.091688 0.187845  
 C -4.752684 2.801965 -2.585766  
 C -4.376476 4.024550 -1.802155  
 C -4.946146 3.935577 -0.532811  
 C -5.139792 1.829605 -1.480678  
 C -5.479710 2.634450 -0.350551  
 H -5.675966 3.022151 -3.176534  
 H -3.995357 2.442818 -3.309953  
 H -3.855330 4.896551 -2.220567  
 H -4.924364 4.722714 0.233891  
 H -5.651981 0.880240 -1.702840  
 H -5.950384 2.264299 0.570465

## 8. P for Type D [5,6] 8-15 concerted mechanism addition between Sc@C<sub>2v</sub>-C<sub>82</sub> and Cp

Energy = -4077.78776644

NIMAG = 0  $\tilde{\nu}$  = 54.23

C -3.538381 -0.740351 -2.373897  
 C -2.495254 -1.465982 -3.060391  
 C -3.539523 0.640393 -2.366310  
 C -3.943054 -1.501843 -1.187305  
 C -2.371921 -2.742245 -2.385657  
 C -1.364435 -0.805602 -3.639375  
 C -2.465913 1.337692 -2.998356  
 C -4.223866 1.459795 -1.281905  
 C -4.229040 -0.796270 0.024640

|   |           |           |           |    |           |           |           |
|---|-----------|-----------|-----------|----|-----------|-----------|-----------|
| C | -3.206366 | -2.733288 | -1.190186 | C  | 2.708358  | -3.231201 | 0.006115  |
| C | -1.158620 | -3.421534 | -2.391186 | C  | 3.140809  | -2.507556 | -1.160379 |
| C | -0.101579 | -1.554489 | -3.690517 | C  | 3.903103  | -0.114349 | -1.496484 |
| C | -1.349511 | 0.655822  | -3.615244 | C  | 2.366390  | 2.276216  | -2.359902 |
| C | -2.339562 | 2.618968  | -2.373893 | C  | 1.537670  | 3.782506  | 0.018544  |
| C | -3.378167 | 2.850949  | -1.285029 | C  | 0.818919  | 3.871227  | 1.243057  |
| C | -4.227288 | 0.670687  | 0.020971  | C  | -1.086294 | 3.272389  | 2.422442  |
| C | -3.914924 | -1.498263 | 1.233350  | C  | -1.343249 | 0.655206  | 3.673117  |
| C | -2.740824 | -3.356928 | 0.024130  | C  | -0.087849 | -1.562300 | 3.716004  |
| C | -0.697737 | -4.125023 | -1.203749 | C  | -0.008429 | -2.865834 | 3.115265  |
| C | -0.024455 | -2.856232 | -3.086591 | C  | 1.174162  | -3.305528 | 2.407615  |
| C | 1.121769  | -0.817185 | -3.768136 | C  | 3.144416  | -2.508307 | 1.172588  |
| C | -0.085504 | 1.380151  | -3.677029 | C  | 3.891826  | -1.340566 | -0.727598 |
| C | -1.116282 | 3.265661  | -2.382256 | C  | 4.027020  | 1.136174  | -0.738368 |
| C | -2.679157 | 3.224335  | 0.018500  | C  | 3.181047  | 2.253026  | -1.153897 |
| C | -3.885705 | 1.343513  | 1.191416  | C  | 2.725457  | 2.962422  | 0.011541  |
| C | -3.528170 | -0.767018 | 2.422318  | C  | 1.232694  | 3.106263  | 2.415337  |
| C | -3.190044 | -2.749547 | 1.237072  | C  | 0.036316  | 2.684937  | 3.119995  |
| C | -1.449716 | -4.068803 | 0.017217  | C  | -0.066354 | 1.383421  | 3.715279  |
| C | 0.740298  | -4.064282 | -1.211748 | C  | 1.134580  | -0.822525 | 3.788821  |
| C | 1.160382  | -3.299540 | -2.386302 | C  | 2.342637  | -2.492357 | 2.369216  |
| C | 2.319737  | -1.274842 | -3.109832 | C  | 3.890757  | -1.342257 | 0.737624  |
| C | 1.132343  | 0.628281  | -3.776637 | C  | 4.020761  | 1.131156  | 0.748526  |
| C | 0.009846  | 2.672729  | -3.066296 | C  | 3.183043  | 2.249041  | 1.172442  |
| C | -0.633936 | 3.977338  | -1.202389 | C  | 2.385050  | 2.273052  | 2.385907  |
| C | -1.384912 | 3.904512  | 0.021890  | C  | 1.146745  | 0.624739  | 3.799419  |
| C | -3.116415 | 2.605042  | 1.193176  | C  | 2.331364  | -1.280016 | 3.129328  |
| C | -3.506372 | 0.620626  | 2.395762  | C  | 3.894990  | -0.117098 | 1.506102  |
| C | -2.489659 | -1.491008 | 3.121580  | C  | 2.350723  | 1.065607  | 3.146622  |
| C | -2.361635 | -2.765037 | 2.434205  | C  | 3.079324  | -0.113616 | 2.691047  |
| C | -0.690198 | -4.130881 | 1.234509  | Sc | 2.171609  | 0.246221  | -0.027729 |
| C | 1.484835  | -3.997095 | 0.009444  | C  | -5.328658 | 3.079387  | -2.707817 |
| C | 2.331059  | -2.488000 | -2.351437 | C  | -4.508919 | 3.908189  | -1.694116 |
| C | 3.066194  | -0.108676 | -2.669097 | C  | -5.479395 | 3.968880  | -0.524719 |
| C | 2.334944  | 1.071549  | -3.124259 | C  | -5.683621 | 1.973649  | -1.688954 |
| C | 1.207440  | 3.101225  | -2.375453 | C  | -6.182360 | 2.811825  | -0.521719 |
| C | 0.797317  | 3.877141  | -1.205948 | H  | -6.226501 | 3.623506  | -3.060437 |
| C | -0.623937 | 3.956096  | 1.239803  | H  | -4.743345 | 2.721777  | -3.578060 |
| C | -2.306640 | 2.602735  | 2.398836  | H  | -4.072038 | 4.864359  | -2.036614 |
| C | -2.457652 | 1.334871  | 3.082579  | H  | -5.504449 | 4.763947  | 0.233264  |
| C | -1.356238 | -0.819494 | 3.682263  | H  | -6.331965 | 1.144196  | -2.026803 |
| C | -1.144417 | -3.437209 | 2.427550  | H  | -6.898150 | 2.470810  | 0.238927  |
| C | 0.749683  | -4.068311 | 1.234477  |    |           |           |           |

**9. RC for Type B [6,6] 7-13 stepwise  
addition between Sc@C<sub>2v</sub>-C<sub>82</sub> and  
Cp**

Energy = -4077.76524994

NIMAG = 0  $\tilde{\nu}$  = 15.61

C -3.383503 -0.733545 -1.991257  
 C -2.358981 -1.471833 -2.703171  
 C -3.360134 0.649817 -1.989988  
 C -3.760285 -1.464651 -0.786637  
 C -2.227498 -2.738727 -2.009760  
 C -1.225506 -0.812420 -3.275523  
 C -2.316443 1.354940 -2.706319  
 C -3.715828 1.395486 -0.789075  
 C -4.053089 -0.766248 0.427950  
 C -3.037335 -2.710920 -0.796913  
 C -1.018405 -3.425765 -2.017369  
 C 0.035629 -1.566392 -3.325339  
 C -1.202145 0.659838 -3.277882  
 C -2.146575 2.620351 -2.015768  
 C -2.955423 2.620324 -0.802885  
 C -4.030532 0.710340 0.427046  
 C -3.730229 -1.462707 1.635018  
 C -2.572688 -3.330473 0.411097  
 C -0.552666 -4.124565 -0.832988  
 C 0.113671 -2.867218 -2.723483  
 C 1.264832 -0.837485 -3.417687  
 C 0.079480 1.374229 -3.328024  
 C -0.917033 3.270771 -2.028888  
 C -2.473421 3.227403 0.404028  
 C -3.688986 1.400450 1.633035  
 C -3.320982 -0.728173 2.828389  
 C -3.008086 -2.708920 1.629224  
 C -1.290926 -4.057451 0.396020  
 C 0.887851 -4.073151 -0.854231  
 C 1.303921 -3.319695 -2.034900  
 C 2.465734 -1.303524 -2.772969  
 C 1.286930 0.608965 -3.428914  
 C 0.197054 2.675168 -2.735033  
 C -0.430192 3.955235 -0.844282  
 C -1.167622 3.911834 0.386826  
 C -2.927330 2.623651 1.624032  
 C -3.302318 0.657115 2.828238

C -2.280624 -1.464504 3.513381  
 C -2.167765 -2.733487 2.820509  
 C -0.522593 -4.122069 1.606281  
 C 1.642646 -4.009082 0.360273  
 C 2.478702 -2.516194 -2.012672  
 C 3.228389 -0.142621 -2.343928  
 C 2.501240 1.041469 -2.790532  
 C 1.403746 3.086726 -2.042983  
 C 1.008116 3.852550 -0.864600  
 C -0.399897 3.956950 1.599219  
 C -2.087780 2.625702 2.816155  
 C -2.239130 1.362535 3.510683  
 C -1.136450 -0.804663 4.068256  
 C -0.959005 -3.418691 2.799762  
 C 0.917571 -4.070555 1.592696  
 C 2.872458 -3.253384 0.344507  
 C 3.300272 -2.537231 -0.828805  
 C 4.069448 -0.152638 -1.175205  
 C 2.553165 2.248683 -2.030162  
 C 1.750696 3.758348 0.351153  
 C 1.038140 3.854641 1.584438  
 C -0.857202 3.273840 2.795963  
 C -1.115268 0.668908 4.067624  
 C 0.126902 -1.558522 4.082464  
 C 0.189705 -2.858862 3.477922  
 C 1.361898 -3.313306 2.760983  
 C 3.329244 -2.534685 1.505354  
 C 4.065573 -1.378551 -0.405848  
 C 4.209772 1.095345 -0.419829  
 C 3.371640 2.218738 -0.830629  
 C 2.935456 2.933706 0.337534  
 C 1.462302 3.090938 2.754001  
 C 0.272436 2.679552 3.475384  
 C 0.169613 1.383704 4.082152  
 C 1.358113 -0.829692 4.141484  
 C 2.536350 -2.510571 2.708494  
 C 4.084552 -1.376948 1.061392  
 C 4.230306 1.097540 1.067189  
 C 3.401142 2.221387 1.495742  
 C 2.610299 2.253269 2.714651  
 C 1.379499 0.616501 4.148578  
 C 2.541285 -1.296580 3.465957  
 C 4.109456 -0.149469 1.828428



C 2.577037 1.047771 3.478028  
 C 3.292714 -0.136607 3.014564  
 Sc 2.367519 0.203162 0.355689  
 C -2.400545 2.470615 -5.745336  
 C -3.701815 1.886199 -5.262430  
 C -3.715161 0.544619 -5.537313  
 C -1.649897 1.277224 -6.270167  
 C -2.444338 0.168066 -6.156710  
 H -2.572627 3.225500 -6.550064  
 H -1.845032 3.019805 -4.950899  
 H -4.508892 2.470546 -4.800048  
 H -4.533446 -0.154243 -5.312310  
 H -0.634125 1.318565 -6.686568  
 H -2.175524 -0.853736 -6.460613

C 0.334475 1.259932 -3.015381  
 C -0.685876 3.163515 -1.750909  
 C -2.250741 3.126550 0.667202  
 C -3.478792 1.303226 1.894697  
 C -3.116805 -0.815962 3.104854  
 C -2.783828 -2.799909 1.917765  
 C -1.046701 -4.143369 0.705886  
 C 1.145564 -4.157583 -0.523747  
 C 1.572930 -3.413179 -1.703718  
 C 2.737344 -1.397155 -2.440021  
 C 1.550109 0.505737 -3.109348  
 C 0.444963 2.572025 -2.444242  
 C -0.209514 3.852927 -0.564288  
 C -0.954631 3.819440 0.660372  
 C -2.718103 2.529713 1.884877  
 C -3.103456 0.569964 3.097907  
 C -2.080018 -1.545423 3.803647  
 C -1.955690 -2.815572 3.118451  
 C -0.291347 -4.201356 1.923340  
 C 1.887319 -4.085646 0.698279  
 C 2.745176 -2.605933 -1.673949  
 C 3.490025 -0.232038 -2.011803  
 C 2.757960 0.946560 -2.465208  
 C 1.638936 2.988845 -1.742609  
 C 1.229252 3.757445 -0.571580  
 C -0.199029 3.877994 1.881103  
 C -1.894840 2.544161 3.085636  
 C -2.048163 1.284432 3.785022  
 C -0.942089 -0.876134 4.363561  
 C -0.741742 -3.493233 3.108513  
 C 1.150120 -4.144293 1.923825  
 C 3.115410 -3.326202 0.691844  
 C 3.554613 -2.616200 -0.481276  
 C 4.313553 -0.230394 -0.829765  
 C 2.797043 2.156485 -1.711493  
 C 1.962650 3.676518 0.651145  
 C 1.239895 3.779310 1.878511  
 C -0.664952 3.198494 3.074325  
 C -0.926451 0.597659 4.354981  
 C 0.323392 -1.623773 4.392446  
 C 0.397412 -2.925976 3.794804  
 C 1.579684 -3.380502 3.091211  
 C 3.559193 -2.600796 1.853389

### 10. TS1 for Type B [6,6] 7-13 stepwise addition between Sc@C<sub>2v</sub>-C<sub>82</sub> and Cp

Energy = -4077.75341217

NIMAG = 1  $\tilde{\nu}$  = -393.98

C -3.133294 -0.840500 -1.715377  
 C -2.104493 -1.584068 -2.427582  
 C -3.120243 0.536705 -1.718442  
 C -3.512831 -1.566863 -0.510098  
 C -1.967012 -2.838021 -1.721096  
 C -0.957558 -0.912081 -2.969902  
 C -2.153852 1.289032 -2.562843  
 C -3.459588 1.273613 -0.527304  
 C -3.825112 -0.869045 0.699078  
 C -2.784548 -2.807738 -0.510717  
 C -0.752373 -3.523436 -1.707010  
 C 0.307598 -1.665435 -3.003672  
 C -0.941287 0.550094 -3.005317  
 C -1.915721 2.522098 -1.756224  
 C -2.705637 2.503538 -0.545130  
 C -3.801820 0.602646 0.691968  
 C -3.513600 -1.558966 1.913157  
 C -2.331361 -3.421657 0.704903  
 C -0.297163 -4.212952 -0.517354  
 C 0.385336 -2.964783 -2.401676  
 C 1.534871 -0.936243 -3.091709

C 4.311451 -1.453398 -0.056168  
 C 4.440082 1.020878 -0.080860  
 C 3.602375 2.139225 -0.506783  
 C 3.153052 2.859322 0.653932  
 C 1.656913 3.026354 3.056091  
 C 0.459812 2.611853 3.766896  
 C 0.355764 1.318177 4.377457  
 C 1.552425 -0.888971 4.458864  
 C 2.750953 -2.573377 3.046561  
 C 4.317961 -1.443415 1.411810  
 C 4.453582 1.033696 1.406630  
 C 3.612741 2.157038 1.820073  
 C 2.807483 2.192078 3.030203  
 C 1.568134 0.555710 4.458904  
 C 2.742264 -1.354540 3.795866  
 C 4.333992 -0.210441 2.172697  
 C 2.770521 0.988848 3.796393  
 C 3.494516 -0.194135 3.344241  
 Sc 2.601606 0.118462 0.710253  
 6 -1.986602 2.341363 -5.040780  
 6 -3.131039 1.792802 -4.196783  
 6 -3.498162 0.544208 -4.790841  
 6 -1.475479 1.105077 -5.716292  
 6 -2.445234 0.110050 -5.637604  
 H -2.429107 3.022564 -5.808931  
 H -1.225142 2.938865 -4.500565  
 H -3.883499 2.465800 -3.756651  
 H -4.386552 -0.044223 -4.524268  
 H -0.524527 1.042885 -6.263099  
 H -2.384844 -0.878994 -6.113153

C -1.177894 -0.838189 -3.294338  
 C -2.430222 1.384582 -2.971106  
 C -3.676730 1.339815 -0.866818  
 C -4.055634 -0.793776 0.370614  
 C -3.011180 -2.729728 -0.832225  
 C -0.973312 -3.444624 -2.022233  
 C 0.090124 -1.596461 -3.324464  
 C -1.152556 0.604890 -3.319902  
 C -2.145043 2.598010 -2.095122  
 C -2.924537 2.572526 -0.886594  
 C -4.027756 0.676433 0.358457  
 C -3.746528 -1.479031 1.588237  
 C -2.558776 -3.340607 0.385068  
 C -0.521314 -4.132363 -0.834957  
 C 0.165979 -2.892503 -2.719040  
 C 1.316677 -0.870279 -3.418465  
 C 0.107043 1.315582 -3.347190  
 C -0.916788 3.233986 -2.091081  
 C -2.476271 3.203605 0.326497  
 C -3.703906 1.380800 1.554796  
 C -3.347755 -0.731835 2.774814  
 C -3.013687 -2.718402 1.596478  
 C -1.271956 -4.060404 0.389384  
 C 0.923147 -4.079841 -0.840156  
 C 1.354251 -3.343901 -2.022489  
 C 2.521506 -1.330471 -2.761464  
 C 1.330774 0.566780 -3.443627  
 C 0.218596 2.635054 -2.780711  
 C -0.439009 3.926006 -0.905939  
 C -1.183785 3.899027 0.318694  
 C -2.945193 2.611525 1.543799  
 C -3.333397 0.654046 2.763777  
 C -2.310437 -1.459484 3.477745  
 C -2.186986 -2.731175 2.799102  
 C -0.519517 -4.117305 1.605963  
 C 1.662987 -4.004782 0.382333  
 C 2.526906 -2.537059 -1.993341  
 C 3.270582 -0.165919 -2.336275  
 C 2.535927 1.011064 -2.798046  
 C 1.406603 3.051541 -2.083067  
 C 0.997247 3.826291 -0.912572  
 C -0.428881 3.960603 1.539610  
 C -2.125753 2.629725 2.745022

## 11. INT for Type B [6,6] 7-13 stepwise addition between Sc@C<sub>2v</sub>-C<sub>82</sub> and Cp

Energy = -4077.75697466

NIMAG = 0  $\tilde{\nu}$  = 43.68

C -3.361924 -0.770516 -2.045643  
 C -2.337212 -1.518721 -2.757871  
 C -3.358162 0.606762 -2.056132  
 C -3.741993 -1.492966 -0.835946  
 C -2.192349 -2.759237 -2.044609

C -2.279111 1.371449 3.447675  
 C -1.173054 -0.786810 4.034686  
 C -0.970802 -3.405814 2.788749  
 C 0.924131 -4.059150 1.607476  
 C 2.891920 -3.246362 0.375634  
 C 3.334888 -2.541230 -0.799187  
 C 4.102498 -0.157270 -1.157659  
 C 2.570186 2.219491 -2.046255  
 C 1.731532 3.750750 0.308901  
 C 1.010175 3.860231 1.536993  
 C -0.895368 3.284821 2.733737  
 C -1.157617 0.687256 4.020948  
 C 0.093109 -1.533319 4.067382  
 C 0.167233 -2.836396 3.473419  
 C 1.351253 -3.292257 2.770353  
 C 3.333738 -2.517201 1.535376  
 C 4.094461 -1.377981 -0.378139  
 C 4.221876 1.097733 -0.414022  
 C 3.378611 2.212392 -0.844950  
 C 2.923309 2.934332 0.313980  
 C 1.426819 3.112468 2.717315  
 C 0.229129 2.699901 3.428334  
 C 0.124578 1.407796 4.042160  
 C 1.322521 -0.798022 4.134608  
 C 2.523505 -2.485547 2.726824  
 C 4.093422 -1.362282 1.090336  
 C 4.221553 1.113192 1.073848  
 C 3.380077 2.237595 1.482063  
 C 2.576312 2.277119 2.693052  
 C 1.336893 0.645456 4.127354  
 C 2.512971 -1.265068 3.473117  
 C 4.100284 -0.126209 1.844679  
 C 2.540312 1.076978 3.463249  
 C 3.266399 -0.106221 3.019341  
 Sc 2.380645 0.188799 0.338472  
 C -2.233852 2.475789 -5.324303  
 C -3.229113 1.800441 -4.351771  
 C -3.644467 0.565820 -5.075587  
 C -1.790412 1.331956 -6.186936  
 C -2.709274 0.279905 -6.078434  
 H -2.785499 3.223833 -5.943331  
 H -1.409224 3.031531 -4.833242  
 H -4.064234 2.443628 -4.012670

H -4.476137 -0.080530 -4.764569  
 H -0.916695 1.357597 -6.853383  
 H -2.684847 -0.645043 -6.672577

## 12. TS2 for Type B [6,6] 7-13 stepwise addition between Sc@C<sub>2v</sub>-C<sub>82</sub> and Cp

Energy = -4077.75635178

NIMAG = 1  $\tilde{\nu}$  = -117.53

C -3.146340 -0.848826 -1.699182  
 C -2.117525 -1.592427 -2.419052  
 C -3.149601 0.526363 -1.710290  
 C -3.508786 -1.573473 -0.488084  
 C -1.967898 -2.840171 -1.708723  
 C -0.975369 -0.916933 -2.967667  
 C -2.242850 1.309359 -2.637548  
 C -3.462447 1.257509 -0.515591  
 C -3.817085 -0.876746 0.722223  
 C -2.775326 -2.810421 -0.491248  
 C -0.750573 -3.524041 -1.700617  
 C 0.291245 -1.666836 -3.007714  
 C -0.973419 0.541981 -3.054830  
 C -1.947500 2.519854 -1.761982  
 C -2.713156 2.490766 -0.543238  
 C -3.796719 0.592355 0.710625  
 C -3.494454 -1.562656 1.936055  
 C -2.311980 -3.420860 0.722171  
 C -0.284622 -4.209137 -0.514057  
 C 0.379268 -2.964683 -2.404908  
 C 1.515309 -0.936015 -3.112618  
 C 0.303179 1.251991 -3.032883  
 C -0.718886 3.155664 -1.764679  
 C -2.255219 3.121578 0.665799  
 C -3.468451 1.298709 1.907582  
 C -3.090032 -0.814225 3.121612  
 C -2.758961 -2.799680 1.937675  
 C -1.024478 -4.138065 0.715161  
 C 1.158707 -4.149411 -0.531896  
 C 1.574704 -3.408210 -1.717225  
 C 2.726701 -1.391015 -2.471082  
 C 1.522474 0.504307 -3.133080

C 0.412827 2.564986 -2.467017  
 C -0.232626 3.848674 -0.584306  
 C -0.965838 3.820957 0.646613  
 C -2.712024 2.528536 1.888212  
 C -3.082089 0.571807 3.110451  
 C -2.044947 -1.537777 3.814635  
 C -1.921171 -2.808474 3.132224  
 C -0.260036 -4.190829 1.926748  
 C 1.909296 -4.070760 0.684061  
 C 2.744578 -2.596963 -1.700165  
 C 3.477744 -0.222103 -2.053219  
 C 2.734277 0.951551 -2.500128  
 C 1.608015 2.987972 -1.776404  
 C 1.205768 3.758898 -0.604349  
 C -0.200137 3.888634 1.861370  
 C -1.881285 2.551332 3.082928  
 C -2.023913 1.293250 3.786724  
 C -0.904502 -0.861375 4.362513  
 C -0.703724 -3.480441 3.113043  
 C 1.181661 -4.128306 1.915667  
 C 3.134425 -3.306609 0.665829  
 C 3.562451 -2.599319 -0.513351  
 C 4.304867 -0.212397 -0.873879  
 C 2.773406 2.162465 -1.751119  
 C 1.950670 3.687957 0.611956  
 C 1.238771 3.794287 1.845704  
 C -0.653415 3.211083 3.059720  
 C -0.894677 0.612458 4.349316  
 C 0.363762 -1.603368 4.382543  
 C 0.438152 -2.906684 3.788129  
 C 1.617441 -3.359546 3.076380  
 C 3.585312 -2.576084 1.821235  
 C 4.318473 -1.433084 -0.097473  
 C 4.431133 1.040634 -0.130087  
 C 3.587187 2.154399 -0.553750  
 C 3.145545 2.877037 0.608108  
 C 1.669494 3.048309 3.022541  
 C 0.479124 2.630678 3.744288  
 C 0.384931 1.338265 4.358698  
 C 1.591125 -0.863308 4.436067  
 C 2.784786 -2.548142 3.019989  
 C 4.339098 -1.417934 1.370721  
 C 4.463722 1.060779 1.356949

C 3.619816 2.182284 1.772795  
 C 2.822703 2.218349 2.988917  
 C 1.601175 0.580601 4.431720  
 C 2.776699 -1.326318 3.764315  
 C 4.359745 -0.181792 2.128315  
 C 2.796398 1.016615 3.757553  
 C 3.521195 -0.164669 3.301821  
 Sc 2.609301 0.125686 0.705389  
 C -2.002654 2.283490 -4.969947  
 C -3.085732 1.750388 -4.012027  
 C -3.552312 0.509244 -4.677972  
 C -1.491560 0.994595 -5.538469  
 C -2.536671 0.044067 -5.509968  
 H -2.497189 2.880754 -5.772649  
 H -1.237313 2.931661 -4.500544  
 H -3.866662 2.461913 -3.686312  
 H -4.470205 -0.032267 -4.412274  
 H -0.531557 0.877498 -6.060742  
 H -2.512742 -0.940147 -5.998746

### 13. P for Type B [6,6] 7-13 stepwise addition between Sc@C<sub>2v</sub>-C<sub>82</sub> and Cp

Energy = -4077.77729729

NIMAG = 0  $\tilde{\nu} = 72.97$

C -3.358992 -0.744683 -2.050296  
 C -2.302614 -1.487390 -2.750486  
 C -3.386902 0.628515 -2.071038  
 C -3.714688 -1.474389 -0.841555  
 C -2.171082 -2.746614 -2.046034  
 C -1.192574 -0.850496 -3.338670  
 C -2.535800 1.450525 -3.017524  
 C -3.696285 1.346999 -0.860597  
 C -4.036798 -0.789044 0.372166  
 C -2.984508 -2.715485 -0.840425  
 C -0.965771 -3.442258 -2.047146  
 C 0.068135 -1.585087 -3.358477  
 C -1.253205 0.658253 -3.689343  
 C -2.183049 2.610659 -2.099144  
 C -2.944572 2.577326 -0.878270

|   |           |           |           |    |           |           |           |
|---|-----------|-----------|-----------|----|-----------|-----------|-----------|
| C | -4.021807 | 0.677261  | 0.364457  | C  | -0.889267 | 3.289250  | 2.731283  |
| C | -3.719663 | -1.481418 | 1.583990  | C  | -1.131936 | 0.687423  | 4.013931  |
| C | -2.533230 | -3.336352 | 0.371357  | C  | 0.127159  | -1.528110 | 4.043779  |
| C | -0.504623 | -4.134047 | -0.857382 | C  | 0.204348  | -2.830814 | 3.447368  |
| C | 0.160976  | -2.882501 | -2.747258 | C  | 1.386042  | -3.283559 | 2.740339  |
| C | 1.296336  | -0.852689 | -3.461744 | C  | 3.354750  | -2.495873 | 1.488428  |
| C | 0.091851  | 1.356349  | -3.400617 | C  | 4.087185  | -1.348964 | -0.425575 |
| C | -0.951451 | 3.232217  | -2.094493 | C  | 4.191969  | 1.122601  | -0.450331 |
| C | -2.486489 | 3.202001  | 0.334166  | C  | 3.356487  | 2.239176  | -0.873392 |
| C | -3.701151 | 1.380152  | 1.567246  | C  | 2.915623  | 2.961224  | 0.286647  |
| C | -3.322386 | -0.736748 | 2.775599  | C  | 1.433590  | 3.126009  | 2.696631  |
| C | -2.986077 | -2.719217 | 1.586381  | C  | 0.242205  | 2.707610  | 3.416489  |
| C | -1.248426 | -4.059398 | 0.366685  | C  | 0.147569  | 1.413944  | 4.027725  |
| C | 0.937044  | -4.073108 | -0.871475 | C  | 1.353716  | -0.787749 | 4.099588  |
| C | 1.352846  | -3.323450 | -2.053426 | C  | 2.551913  | -2.471517 | 2.686439  |
| C | 2.495181  | -1.302925 | -2.809516 | C  | 4.111927  | -1.337070 | 1.042474  |
| C | 1.294148  | 0.598161  | -3.465668 | C  | 4.234763  | 1.143016  | 1.035602  |
| C | 0.184984  | 2.631399  | -2.793422 | C  | 3.390028  | 2.263718  | 1.451809  |
| C | -0.464034 | 3.918942  | -0.912566 | C  | 2.588288  | 2.297092  | 2.664757  |
| C | -1.198330 | 3.898871  | 0.317823  | C  | 1.364050  | 0.656829  | 4.100739  |
| C | -2.946068 | 2.608619  | 1.554048  | C  | 2.541988  | -1.249595 | 3.431696  |
| C | -3.316192 | 0.649140  | 2.767849  | C  | 4.137142  | -0.102416 | 1.805670  |
| C | -2.279822 | -1.461029 | 3.469593  | C  | 2.560679  | 1.093973  | 3.431369  |
| C | -2.151814 | -2.730163 | 2.782133  | C  | 3.287650  | -0.087461 | 2.973302  |
| C | -0.487147 | -4.113142 | 1.582623  | SC | 2.377575  | 0.191888  | 0.425071  |
| C | 1.683871  | -3.993040 | 0.346746  | C  | -2.164734 | 2.274448  | -5.269157 |
| C | 2.519100  | -2.510976 | -2.035297 | C  | -3.333532 | 1.931948  | -4.323534 |
| C | 3.247286  | -0.132858 | -2.381546 | C  | -3.886247 | 0.678905  | -4.977523 |
| C | 2.505542  | 1.039058  | -2.821799 | C  | -1.595193 | 0.842362  | -5.260457 |
| C | 1.379747  | 3.063782  | -2.095395 | C  | -2.842625 | 0.024840  | -5.539145 |
| C | 0.975117  | 3.833244  | -0.928996 | H  | -2.517201 | 2.577680  | -6.274649 |
| C | -0.433682 | 3.968119  | 1.533716  | H  | -1.469984 | 3.039582  | -4.870102 |
| C | -2.116921 | 2.629800  | 2.751662  | H  | -4.056847 | 2.732167  | -4.082123 |
| C | -2.260188 | 1.369449  | 3.450693  | H  | -4.923766 | 0.327204  | -4.889030 |
| C | -1.140988 | -0.786207 | 4.022857  | H  | -0.707650 | 0.630354  | -5.884533 |
| C | -0.935165 | -3.404065 | 2.767867  | H  | -2.852357 | -0.971519 | -6.002113 |
| C | 0.952868  | -4.051966 | 1.576281  |    |           |           |           |
| C | 2.905957  | -3.224916 | 0.331184  |    |           |           |           |
| C | 3.333122  | -2.513828 | -0.846482 |    |           |           |           |
| C | 4.065571  | -0.127092 | -1.199373 |    |           |           |           |
| C | 2.546047  | 2.248838  | -2.074278 |    |           |           |           |
| C | 1.719235  | 3.769209  | 0.288491  |    |           |           |           |
| C | 1.004400  | 3.874869  | 1.520557  |    |           |           |           |

**14. RC for Type D [5,6] 8-15  
concerted mechanism addition  
between Y@C<sub>2v</sub>-C<sub>82</sub> and Cp**

Energy = -3355.43517565

NIMAG = 0  $\tilde{\nu} = 6.71$

C -3.617759 -0.774741 -2.321894  
C -2.587678 -1.496907 -3.037671  
C -3.619792 0.609696 -2.324456  
C -3.977086 -1.512265 -1.113338  
C -2.433047 -2.761247 -2.346044  
C -1.472056 -0.820857 -3.631886  
C -2.591804 1.330173 -3.045177  
C -3.985452 1.354306 -1.120721  
C -4.268181 -0.815935 0.102411  
C -3.235391 -2.745969 -1.127920  
C -1.212596 -3.426809 -2.362294  
C -0.198367 -1.554432 -3.685095  
C -1.474434 0.652587 -3.636298  
C -2.437302 2.596728 -2.356892  
C -3.242246 2.587853 -1.139689  
C -4.267711 0.660079 0.100288  
C -3.929505 -1.507498 1.308276  
C -2.751387 -3.357350 0.077561  
C -0.726846 -4.118605 -1.181197  
C -0.095544 -2.851526 -3.078614  
C 1.019060 -0.805797 -3.787916  
C -0.202580 1.388224 -3.694881  
C -1.219060 3.265786 -2.379848  
C -2.754815 3.197718 0.064708  
C -3.936748 1.356303 1.301484  
C -3.524160 -0.765750 2.497455  
C -3.187294 -2.742906 1.297926  
C -1.457030 -4.062581 0.052926  
C 0.712266 -4.045695 -1.214049  
C 1.106980 -3.285146 -2.398390  
C 2.232111 -1.253430 -3.150485  
C 1.016545 0.639991 -3.798410  
C -0.101869 2.688241 -3.094144  
C -0.735112 3.960712 -1.199639  
C -1.462888 3.905017 0.037190  
C -3.194640 2.594690 1.286584  
C -3.526711 0.620201 2.493560  
C -2.465923 -1.484102 3.174040  
C -2.337862 -2.752303 2.482831  
C -0.678599 -4.114076 1.257553  
C 1.474850 -3.968822 -0.005075

C 2.271003 -2.465238 -2.388591  
C 2.979157 -0.078377 -2.727234  
C 2.230007 1.094782 -3.167478  
C 1.103010 3.123723 -2.413592  
C 0.704147 3.886303 -1.231848  
C -0.687185 3.966955 1.243618  
C -2.344623 2.608831 2.471430  
C -2.469966 1.343630 3.167004  
C -1.327987 -0.805066 3.719769  
C -1.117499 -3.417631 2.453901  
C 0.760981 -4.041145 1.233270  
C 2.693728 -3.194634 -0.030898  
C 3.102935 -2.473177 -1.208735  
C 3.829615 -0.075156 -1.564216  
C 2.268998 2.307489 -2.411374  
C 1.457972 3.806900 -0.020434  
C 0.753510 3.892301 1.218685  
C -1.124459 3.277605 2.443373  
C -1.330492 0.668573 3.717078  
C -0.052980 -1.538523 3.725820  
C 0.026642 -2.838849 3.122958  
C 1.201749 -3.275505 2.397716  
C 3.149052 -2.468143 1.126837  
C 3.855510 -1.302859 -0.793274  
C 3.940120 1.176506 -0.807585  
C 3.099492 2.297773 -1.217002  
C 2.660445 3.005086 -0.042756  
C 1.198063 3.134823 2.386498  
C 0.019670 2.702134 3.114872  
C -0.057546 1.404226 3.722955  
C 1.167426 -0.789446 3.777264  
C 2.364163 -2.455514 2.338450  
C 3.885283 -1.299647 0.677383  
C 3.971483 1.180237 0.678662  
C 3.146904 2.303664 1.116229  
C 2.363050 2.318560 2.341785  
C 1.165079 0.656343 3.781716  
C 2.354816 -1.240101 3.095559  
C 3.892109 -0.068622 1.444385  
C 2.353239 1.108373 3.103127  
C 3.084714 -0.066824 2.638098  
Y 1.936871 0.218505 -0.014846  
C -5.913915 3.306464 -2.943157

C -5.430850 4.474693 -2.126907  
 C -5.895072 4.342283 -0.846302  
 C -6.662629 2.461991 -1.947473  
 C -6.658302 3.098203 -0.735465  
 H -6.582320 3.641160 -3.772682  
 H -5.086350 2.756072 -3.447032  
 H -4.821249 5.297710 -2.524313  
 H -5.712947 5.040138 -0.016418  
 H -7.147930 1.506058 -2.187281  
 H -7.128296 2.733065 0.189015

C -3.135164 1.040242 1.424589  
 C -2.763158 -1.078809 2.635766  
 C -2.428140 -3.056307 1.439457  
 C -0.695373 -4.379356 0.208738  
 C 1.487297 -4.375925 -1.034107  
 C 1.902329 -3.615885 -2.212386  
 C 3.053481 -1.591280 -2.945822  
 C 1.861113 0.313740 -3.604931  
 C 0.750155 2.366298 -2.901475  
 C 0.108676 3.641226 -1.016472  
 C -0.635116 3.585465 0.209856  
 C -2.395349 2.298404 1.430690  
 C -2.749331 0.307719 2.624443  
 C -1.719820 -1.805340 3.325459  
 C -1.594043 -3.074869 2.634790  
 C 0.069961 -4.441398 1.422120  
 C 2.237888 -4.308055 0.183417  
 C 3.072783 -2.805456 -2.186918  
 C 3.804895 -0.423349 -2.511177  
 C 3.071788 0.757183 -2.957995  
 C 1.952028 2.793508 -2.210141  
 C 1.548836 3.559531 -1.034143  
 C 0.126361 3.641791 1.425071  
 C -1.561196 2.297404 2.619183  
 C -1.698941 1.026147 3.306650  
 C -0.582682 -1.131946 3.879548  
 C -0.376580 -3.746486 2.616334  
 C 1.510237 -4.378413 1.413568  
 C 3.463257 -3.543752 0.173046  
 C 3.892372 -2.823608 -0.998300  
 C 4.643601 -0.429625 -1.338988  
 C 3.112662 1.967106 -2.198553  
 C 2.287471 3.470831 0.186840  
 C 1.570148 3.559723 1.417491  
 C -0.331384 2.957911 2.615293  
 C -0.573089 0.342508 3.874289  
 C 0.686241 -1.874372 3.900840  
 C 0.763843 -3.175732 3.298372  
 C 1.943805 -3.618863 2.585359  
 C 3.911041 -2.823546 1.338065  
 C 4.648120 -1.659495 -0.570962  
 C 4.757093 0.819690 -0.578977  
 C 3.930391 1.949429 -0.995711

### 15. TS for Type D [5,6] 8-15 concerted mechanism addition between Y@C<sub>2v</sub>-C<sub>82</sub> and Cp

Energy = -3355.42334143

NIMAG = 1  $\tilde{\nu}$  = -415.38

C -2.803222 -1.061196 -2.176853  
 C -1.767097 -1.789837 -2.878223  
 C -2.805730 0.320081 -2.184356  
 C -3.191207 -1.812291 -0.980167  
 C -1.633887 -3.058458 -2.194523  
 C -0.639530 -1.126191 -3.463678  
 C -1.747493 1.019708 -2.861266  
 C -3.318102 1.121084 -1.022868  
 C -3.468929 -1.109132 0.234467  
 C -2.455595 -3.044511 -0.988049  
 C -0.419339 -3.735878 -2.200449  
 C 0.627040 -1.871155 -3.509704  
 C -0.628794 0.341222 -3.457964  
 C -1.588688 2.283179 -2.173868  
 C -2.446223 2.325565 -1.003829  
 C -3.452854 0.356178 0.237377  
 C -3.157311 -1.811077 1.443698  
 C -1.985343 -3.666578 0.222722  
 C 0.047710 -4.438141 -1.017594  
 C 0.711150 -3.169374 -2.903209  
 C 1.851118 -1.131648 -3.595794  
 C 0.646723 1.068802 -3.507491  
 C -0.368051 2.950423 -2.198275  
 C -1.936424 2.893339 0.217664

|   |           |           |           |   |           |           |           |
|---|-----------|-----------|-----------|---|-----------|-----------|-----------|
| C | 3.483213  | 2.658067  | 0.175572  | C | -4.218918 | 1.475231  | -1.288812 |
| C | 1.991367  | 2.795157  | 2.586041  | C | -4.231171 | -0.782147 | 0.015643  |
| C | 0.798050  | 2.369992  | 3.297809  | C | -3.209315 | -2.719724 | -1.199043 |
| C | 0.704705  | 1.069842  | 3.900168  | C | -1.159846 | -3.410685 | -2.396823 |
| C | 1.910494  | -1.133167 | 3.966010  | C | -0.097402 | -1.545334 | -3.693031 |
| C | 3.112077  | -2.806868 | 2.540445  | C | -1.340479 | 0.667262  | -3.616562 |
| C | 4.660211  | -1.659852 | 0.899662  | C | -2.329675 | 2.631390  | -2.376016 |
| C | 4.769531  | 0.819534  | 0.907955  | C | -3.369810 | 2.865136  | -1.289263 |
| C | 3.949223  | 1.949573  | 1.338526  | C | -4.226113 | 0.685071  | 0.013087  |
| C | 3.150233  | 1.968118  | 2.553991  | C | -3.920523 | -1.485459 | 1.224366  |
| C | 1.919819  | 0.312804  | 3.974640  | C | -2.746595 | -3.344618 | 0.015638  |
| C | 3.102895  | -1.592238 | 3.299078  | C | -0.702228 | -4.115366 | -1.209620 |
| C | 4.668146  | -0.429927 | 1.668854  | C | -0.023700 | -2.847576 | -3.090295 |
| C | 3.120779  | 0.756342  | 3.311916  | C | 1.128317  | -0.809856 | -3.771026 |
| C | 3.847400  | -0.423814 | 2.853269  | C | -0.075032 | 1.389410  | -3.676556 |
| Y | 2.734032  | -0.114872 | 0.181927  | C | -1.104751 | 3.276144  | -2.381586 |
| C | -4.770312 | 2.763033  | -2.587910 | C | -2.672098 | 3.235895  | 0.015364  |
| C | -4.391565 | 3.988148  | -1.809336 | C | -3.884891 | 1.356253  | 1.184549  |
| C | -4.961595 | 3.904866  | -0.539369 | C | -3.533715 | -0.755870 | 2.414040  |
| C | -5.154040 | 1.795044  | -1.477873 | C | -3.197030 | -2.738081 | 1.228347  |
| C | -5.493852 | 2.604333  | -0.350901 | C | -1.455895 | -4.058425 | 0.010164  |
| H | -5.695359 | 2.981476  | -3.176545 | C | 0.736906  | -4.059075 | -1.215663 |
| H | -4.015200 | 2.401036  | -3.313013 | C | 1.160372  | -3.294698 | -2.388872 |
| H | -3.872608 | 4.859222  | -2.232371 | C | 2.326127  | -1.272721 | -3.113223 |
| H | -4.939675 | 4.695427  | 0.223802  | C | 1.141353  | 0.634799  | -3.776478 |
| H | -5.663425 | 0.842930  | -1.694642 | C | 0.021558  | 2.682176  | -3.064886 |
| H | -5.962972 | 2.237692  | 0.572311  | C | -0.623736 | 3.987493  | -1.201627 |

**16. P for Type D [5,6] 8-15 concerted  
mechanism addition between  
Y@C<sub>2v</sub>-C<sub>82</sub> and Cp**

Energy = -3355.45911849

NIMAG = 0  $\tilde{\nu}$  = 48.11

|   |           |           |           |   |           |           |           |
|---|-----------|-----------|-----------|---|-----------|-----------|-----------|
| C | -3.535736 | -0.725399 | -2.381246 | C | -3.509013 | 0.631725  | 2.388806  |
| C | -2.492312 | -1.452948 | -3.066192 | C | -2.497380 | -1.482982 | 3.114071  |
| C | -3.533953 | 0.655214  | -2.372334 | C | -2.371028 | -2.756227 | 2.427028  |
| C | -3.944867 | -1.487273 | -1.196550 | C | -0.698728 | -4.123182 | 1.228760  |
| C | -2.372870 | -2.729368 | -2.393155 | C | 1.478858  | -3.994447 | 0.007352  |
| C | -1.358581 | -0.794002 | -3.642277 | C | 2.334254  | -2.486905 | -2.354491 |
| C | -2.457028 | 1.351094  | -3.000841 | C | 3.075069  | -0.106537 | -2.671245 |
|   |           |           |           | C | 2.346416  | 1.077119  | -3.121970 |
|   |           |           |           | C | 1.219000  | 3.110571  | -2.373614 |
|   |           |           |           | C | 0.808655  | 3.887657  | -1.203446 |
|   |           |           |           | C | -0.617691 | 3.963580  | 1.240459  |
|   |           |           |           | C | -2.305176 | 2.611604  | 2.395393  |
|   |           |           |           | C | -2.459592 | 1.343771  | 3.077271  |
|   |           |           |           | C | -1.362832 | -0.813589 | 3.676495  |



C -1.153793 -3.430146 2.421181  
 C 0.742150 -4.065554 1.231585  
 C 2.705663 -3.232441 0.006686  
 C 3.143134 -2.509736 -1.159936  
 C 3.904582 -0.115788 -1.492822  
 C 2.379986 2.285687 -2.359078  
 C 1.547027 3.792672 0.023108  
 C 0.826091 3.881050 1.247222  
 C -1.083064 3.279173 2.421159  
 C -1.346785 0.661147 3.668356  
 C -0.096432 -1.558870 3.712218  
 C -0.018250 -2.861890 3.111324  
 C 1.166347 -3.304970 2.405955  
 C 3.143837 -2.512457 1.175409  
 C 3.896934 -1.345283 -0.725126  
 C 4.015034 1.134080 -0.730519  
 C 3.193530 2.266109 -1.151109  
 C 2.738838 2.974347 0.017645  
 C 1.236584 3.113702 2.420721  
 C 0.037287 2.690146 3.120584  
 C -0.068684 1.387308 3.713737  
 C 1.128291 -0.820620 3.788894  
 C 2.337370 -2.495304 2.372183  
 C 3.897069 -1.348392 0.743965  
 C 4.014063 1.130258 0.755969  
 C 3.195001 2.261797 1.182643  
 C 2.391274 2.281261 2.394831  
 C 1.142768 0.625615 3.799508  
 C 2.325927 -1.281967 3.132417  
 C 3.901356 -0.120384 1.514449  
 C 2.350741 1.067138 3.149389  
 C 3.077211 -0.114837 2.695256  
 Y 1.979455 0.213128 -0.000035  
 C -5.317759 3.098973 -2.714704  
 C -4.498007 3.925169 -1.699063  
 C -5.469744 3.986500 -0.530876  
 C -5.676911 1.993031 -1.697668  
 C -6.175150 2.830884 -0.530066  
 H -6.213765 3.645325 -3.068655  
 H -4.731590 2.740882 -3.584230  
 H -4.058699 4.880761 -2.040192  
 H -5.494129 4.780495 0.228305  
 H -6.326613 1.165472 -2.037610

H -6.892376 2.490692 0.229647

### 17. RC for Type B [6,6] 7-13 stepwise addition between Y@C<sub>2v</sub>-C<sub>82</sub> and Cp

Energy = -3355.43676691

NIMAG = 0  $\tilde{\nu}$  = 15.77

C -3.453824 -0.714667 -2.013283  
 C -2.424511 -1.452140 -2.718934  
 C -3.430891 0.668616 -2.014967  
 C -3.832630 -1.442798 -0.807087  
 C -2.291565 -2.715194 -2.022855  
 C -1.290209 -0.789980 -3.290856  
 C -2.387583 1.375416 -2.730667  
 C -3.793269 1.417535 -0.817981  
 C -4.129614 -0.741460 0.404842  
 C -3.104204 -2.686164 -0.811160  
 C -1.078411 -3.398190 -2.026079  
 C -0.028051 -1.539684 -3.337154  
 C -1.269328 0.682035 -3.296443  
 C -2.223617 2.643214 -2.043424  
 C -3.036817 2.644597 -0.833711  
 C -4.110627 0.735374 0.398982  
 C -3.809188 -1.432483 1.615779  
 C -2.640636 -3.297920 0.400831  
 C -0.614548 -4.088605 -0.836907  
 C 0.052489 -2.838482 -2.731807  
 C 1.200980 -0.805498 -3.435281  
 C 0.011194 1.400810 -3.343131  
 C -0.996517 3.297367 -2.052889  
 C -2.559639 3.259139 0.371719  
 C -3.772915 1.430671 1.603004  
 C -3.404598 -0.692660 2.807863  
 C -3.081575 -2.675751 1.616236  
 C -1.354005 -4.018491 0.391736  
 C 0.827131 -4.030616 -0.854238  
 C 1.247103 -3.282807 -2.036925  
 C 2.403901 -1.270068 -2.791859  
 C 1.220704 0.639853 -3.435074  
 C 0.122648 2.704620 -2.754213  
 C -0.514746 3.990618 -0.871505

C -1.257944 3.950578 0.355739  
 C -3.015292 2.656181 1.591807  
 C -3.386528 0.692493 2.801373  
 C -2.363481 -1.423374 3.497614  
 C -2.245115 -2.693254 2.811158  
 C -0.591208 -4.077762 1.606419  
 C 1.568493 -3.950935 0.364027  
 C 2.421312 -2.479108 -2.027861  
 C 3.162449 -0.102466 -2.352363  
 C 2.433267 1.078519 -2.790449  
 C 1.323276 3.129224 -2.064381  
 C 0.924606 3.900918 -0.889164  
 C -0.491283 4.000598 1.567910  
 C -2.178284 2.665287 2.785483  
 C -2.327582 1.404423 3.484541  
 C -1.221671 -0.756921 4.053778  
 C -1.032319 -3.374489 2.797304  
 C 0.850076 -4.019572 1.596491  
 C 2.780602 -3.163277 0.349119  
 C 3.240115 -2.469775 -0.825349  
 C 4.001443 -0.107139 -1.180654  
 C 2.478565 2.295705 -2.037028  
 C 1.673787 3.823051 0.328285  
 C 0.947867 3.911091 1.558853  
 C -0.950115 3.316956 2.763665  
 C -1.202605 0.716351 4.045789  
 C 0.042797 -1.506375 4.076707  
 C 0.111475 -2.808672 3.477619  
 C 1.291891 -3.259971 2.764075  
 C 3.262936 -2.459509 1.508417  
 C 4.089546 -1.355175 -0.414803  
 C 4.032407 1.125352 -0.417819  
 C 3.297609 2.301772 -0.848930  
 C 2.884353 3.035674 0.320202  
 C 1.368358 3.149387 2.732603  
 C 0.180843 2.730219 3.448311  
 C 0.080761 1.435708 4.059616  
 C 1.273403 -0.771702 4.143187  
 C 2.466297 -2.457265 2.725784  
 C 4.104682 -1.348722 1.071737  
 C 4.046727 1.131896 1.053067  
 C 3.319532 2.311864 1.487281  
 C 2.522102 2.315965 2.690619

C 1.292239 0.673388 4.129148  
 C 2.462581 -1.241726 3.478822  
 C 4.031300 -0.093747 1.827869  
 C 2.491432 1.105967 3.455755  
 C 3.212436 -0.078271 3.013840  
 Y 2.088732 -0.370300 0.347426  
 C -2.460119 2.478896 -5.772196  
 C -3.769902 1.916076 -5.286902  
 C -3.801161 0.572660 -5.551157  
 C -1.724919 1.271362 -6.286341  
 C -2.534637 0.173970 -6.165599  
 H -2.620778 3.229316 -6.583455  
 H -1.898364 3.027295 -4.981625  
 H -4.569425 2.515017 -4.830087  
 H -4.629240 -0.113186 -5.321924  
 H -0.708238 1.295983 -6.701916  
 H -2.279502 -0.853652 -6.461686

### 18. TS1 for Type B [6,6] 7-13 stepwise addition between Y@C<sub>2v</sub>-C<sub>82</sub> and Cp

Energy = -3355.42486363

NIMAG = 1  $\tilde{\nu}$  = -397.56

C -3.127177 -0.851801 -1.720366  
 C -2.094594 -1.595287 -2.427412  
 C -3.114652 0.525202 -1.726762  
 C -3.508534 -1.575340 -0.513529  
 C -1.955820 -2.845300 -1.718829  
 C -0.947025 -0.920264 -2.969774  
 C -2.148838 1.278540 -2.571149  
 C -3.459878 1.265385 -0.538620  
 C -3.824163 -0.874802 0.693153  
 C -2.775061 -2.813325 -0.508679  
 C -0.737119 -3.526835 -1.700819  
 C 0.318956 -1.669619 -3.000160  
 C -0.932983 0.541311 -3.007832  
 C -1.915837 2.513848 -1.767243  
 C -2.709894 2.497047 -0.558606  
 C -3.804294 0.597108 0.681408  
 C -3.514665 -1.559609 1.910799  
 C -2.322471 -3.419767 0.710498

C -0.283230 -4.207803 -0.506307  
 C 0.398928 -2.967135 -2.395078  
 C 1.546250 -0.935398 -3.093809  
 C 0.341599 1.255222 -3.014176  
 C -0.688346 3.158702 -1.758561  
 C -2.259038 3.127022 0.652048  
 C -3.484657 1.302534 1.882188  
 C -3.122023 -0.811721 3.101250  
 C -2.779696 -2.797510 1.920918  
 C -1.033344 -4.135490 0.716830  
 C 1.160679 -4.146863 -0.509346  
 C 1.591352 -3.407849 -1.691054  
 C 2.750589 -1.394796 -2.443354  
 C 1.559078 0.505041 -3.099653  
 C 0.447049 2.570220 -2.447841  
 C -0.216404 3.856673 -0.575423  
 C -0.966874 3.826507 0.645914  
 C -2.727752 2.530909 1.869856  
 C -3.109042 0.574037 3.088264  
 C -2.084252 -1.535771 3.804072  
 C -1.954956 -2.806729 3.124856  
 C -0.282763 -4.188348 1.938160  
 C 1.889518 -4.059944 0.716104  
 C 2.762902 -2.600094 -1.674186  
 C 3.499233 -0.223013 -2.004713  
 C 2.766436 0.952633 -2.450996  
 C 1.635725 3.000106 -1.749707  
 C 1.222986 3.773880 -0.580913  
 C -0.211923 3.889355 1.865828  
 C -1.906282 2.551956 3.071834  
 C -2.057580 1.294511 3.775625  
 C -0.948477 -0.860353 4.365163  
 C -0.737233 -3.480310 3.121213  
 C 1.159571 -4.125533 1.941984  
 C 3.100147 -3.268935 0.709972  
 C 3.569713 -2.580725 -0.463561  
 C 4.324877 -0.217046 -0.822361  
 C 2.800075 2.172953 -1.705577  
 C 1.963533 3.708862 0.642960  
 C 1.228128 3.802683 1.868026  
 C -0.678933 3.209649 3.058449  
 C -0.934660 0.612956 4.349399  
 C 0.318084 -1.603816 4.402282

C 0.397281 -2.907933 3.809624  
 C 1.587161 -3.359079 3.108801  
 C 3.570065 -2.558755 1.870647  
 C 4.410936 -1.460963 -0.050237  
 C 4.343244 1.019479 -0.067486  
 C 3.607716 2.191053 -0.512779  
 C 3.179104 2.928858 0.649909  
 C 1.641464 3.051101 3.049086  
 C 0.447432 2.629804 3.755381  
 C 0.346234 1.337542 4.370625  
 C 1.546496 -0.863764 4.477001  
 C 2.758950 -2.552681 3.078765  
 C 4.413967 -1.447217 1.436610  
 C 4.343899 1.033876 1.403355  
 C 3.606545 2.213737 1.824077  
 C 2.797305 2.220602 3.019970  
 C 1.560025 0.579634 4.455190  
 C 2.742437 -1.332440 3.824635  
 C 4.328215 -0.187589 2.184335  
 C 2.764453 1.013705 3.789504  
 C 3.493959 -0.168972 3.360940  
 Y 2.400157 -0.484264 0.700052  
 C -1.976423 2.320150 -5.053008  
 C -3.123177 1.777126 -4.208560  
 C -3.492317 0.526972 -4.798174  
 C -1.467844 1.080679 -5.724757  
 C -2.439126 0.087515 -5.642175  
 H -2.415701 3.001008 -5.823183  
 H -1.213609 2.916661 -4.513406  
 H -3.874641 2.453575 -3.772025  
 H -4.381913 -0.058896 -4.529990  
 H -0.516871 1.015098 -6.271159  
 H -2.380367 -0.903341 -6.114224

### 19. INT for Type B [6,6] 7-13 stepwise addition between Y@C<sub>2v</sub>-C<sub>82</sub> and Cp

Energy = -3355.42862008

NIMAG = 0  $\tilde{\nu}$  = 46.95

C -3.433303 -0.750399 -2.064286  
 C -2.405638 -1.499820 -2.772267

|   |           |           |           |   |           |           |           |
|---|-----------|-----------|-----------|---|-----------|-----------|-----------|
| C | -3.430011 | 0.626516  | -2.078787 | C | 0.913830  | 3.874294  | -0.937060 |
| C | -3.814950 | -1.469419 | -0.852823 | C | -0.518899 | 4.004593  | 1.509361  |
| C | -2.259512 | -2.735957 | -2.056641 | C | -2.214066 | 2.670240  | 2.716561  |
| C | -1.245721 | -0.816284 | -3.308382 | C | -2.365404 | 1.414079  | 3.423784  |
| C | -2.502775 | 1.404842  | -2.994673 | C | -1.256585 | -0.738316 | 4.022145  |
| C | -3.753548 | 1.363427  | -0.892139 | C | -1.043540 | -3.360167 | 2.787275  |
| C | -4.131801 | -0.767278 | 0.351059  | C | 0.856258  | -4.009803 | 1.611565  |
| C | -3.079077 | -2.703394 | -0.843647 | C | 2.799275  | -3.158641 | 0.378722  |
| C | -1.036592 | -3.418072 | -2.030433 | C | 3.273420  | -2.476618 | -0.797162 |
| C | 0.023240  | -1.570949 | -3.335604 | C | 4.030135  | -0.114103 | -1.163861 |
| C | -1.221695 | 0.626232  | -3.334651 | C | 2.496046  | 2.266198  | -2.055690 |
| C | -2.221991 | 2.620930  | -2.120579 | C | 1.655155  | 3.815466  | 0.285494  |
| C | -3.006132 | 2.598062  | -0.914444 | C | 0.920819  | 3.916281  | 1.511259  |
| C | -4.106961 | 0.703137  | 0.334008  | C | -0.986533 | 3.328946  | 2.703484  |
| C | -3.824889 | -1.447216 | 1.572375  | C | -1.242935 | 0.735386  | 4.001320  |
| C | -2.627276 | -3.306615 | 0.377203  | C | 0.010647  | -1.480717 | 4.062604  |
| C | -0.585586 | -4.095951 | -0.837938 | C | 0.089687  | -2.785688 | 3.473780  |
| C | 0.101100  | -2.865166 | -2.726779 | C | 1.281301  | -3.238710 | 2.773302  |
| C | 1.249492  | -0.840179 | -3.435685 | C | 3.266018  | -2.443049 | 1.537055  |
| C | 0.036443  | 1.340510  | -3.359311 | C | 4.114810  | -1.355244 | -0.386938 |
| C | -0.996368 | 3.260120  | -2.113458 | C | 4.041236  | 1.125290  | -0.413825 |
| C | -2.561866 | 3.236368  | 0.296634  | C | 3.303716  | 2.294105  | -0.865585 |
| C | -3.786652 | 1.412870  | 1.528184  | C | 2.871780  | 3.035987  | 0.295045  |
| C | -3.430226 | -0.694830 | 2.757340  | C | 1.334064  | 3.169865  | 2.695435  |
| C | -3.087031 | -2.683624 | 1.586215  | C | 0.139484  | 2.750840  | 3.402404  |
| C | -1.336396 | -4.020887 | 0.386584  | C | 0.037841  | 1.460127  | 4.020983  |
| C | 0.860414  | -4.038517 | -0.840055 | C | 1.239363  | -0.740046 | 4.137269  |
| C | 1.294545  | -3.308511 | -2.024086 | C | 2.453175  | -2.432487 | 2.743719  |
| C | 2.456892  | -1.298702 | -2.780459 | C | 4.110936  | -1.333805 | 1.100049  |
| C | 1.261300  | 0.595512  | -3.447647 | C | 4.037403  | 1.146032  | 1.056433  |
| C | 0.143767  | 2.664179  | -2.799116 | C | 3.298129  | 2.327619  | 1.471423  |
| C | -0.522933 | 3.960951  | -0.931851 | C | 2.489027  | 2.339033  | 2.668280  |
| C | -1.273277 | 3.938337  | 0.289206  | C | 1.251502  | 0.702238  | 4.108327  |
| C | -3.032053 | 2.645375  | 1.514300  | C | 2.435114  | -1.209946 | 3.486000  |
| C | -3.416114 | 0.690880  | 2.740317  | C | 4.020072  | -0.071194 | 1.841822  |
| C | -2.391549 | -1.417022 | 3.464065  | C | 2.456996  | 1.134759  | 3.441413  |
| C | -2.263656 | -2.689974 | 2.791781  | C | 3.187840  | -0.048231 | 3.019660  |
| C | -0.588164 | -4.072207 | 1.606678  | Y | 2.098631  | -0.382527 | 0.339042  |
| C | 1.587464  | -3.948472 | 0.385979  | C | -2.303199 | 2.490699  | -5.350907 |
| C | 2.467595  | -2.501690 | -2.009195 | C | -3.296834 | 1.814220  | -4.376595 |
| C | 3.202834  | -0.126897 | -2.346837 | C | -3.710686 | 0.577289  | -5.099282 |
| C | 2.467184  | 1.046866  | -2.798748 | C | -1.864450 | 1.349938  | -6.220526 |
| C | 1.325989  | 3.093089  | -2.105300 | C | -2.779219 | 0.295062  | -6.106794 |

H -2.854076 3.243730 -5.964510  
H -1.475268 3.041863 -4.859946  
H -4.134341 2.457054 -4.042182  
H -4.539123 -0.071668 -4.785081  
H -0.995533 1.379235 -6.893077  
H -2.755954 -0.628897 -6.702636

## 20. TS2 for Type B [6,6] 7-13 stepwise addition between Y@C<sub>2v</sub>-C<sub>82</sub> and Cp

Energy = -3355.42726383

NIMAG = 1  $\tilde{\nu}$  = -122.15

C -3.137114 -0.834626 -1.723380  
C -2.105403 -1.578176 -2.439257  
C -3.136791 0.540565 -1.728920  
C -3.509208 -1.563314 -0.517470  
C -1.963558 -2.828696 -1.733844  
C -0.957253 -0.902438 -2.976434  
C -2.221957 1.325909 -2.646560  
C -3.455898 1.267441 -0.532835  
C -3.823715 -0.870914 0.693774  
C -2.778691 -2.802052 -0.520990  
C -0.747299 -3.515238 -1.720275  
C 0.307028 -1.654881 -3.011561  
C -0.951546 0.557382 -3.059732  
C -1.929462 2.531311 -1.764060  
C -2.702602 2.498699 -0.550491  
C -3.799699 0.598305 0.688329  
C -3.510617 -1.562620 1.906798  
C -2.324450 -3.418012 0.692896  
C -0.290564 -4.205566 -0.533459  
C 0.388193 -2.955574 -2.414628  
C 1.535021 -0.925996 -3.107544  
C 0.327563 1.264348 -3.024587  
C -0.698536 3.163875 -1.755197  
C -2.250837 3.123560 0.664128  
C -3.477803 1.298961 1.890565  
C -3.111675 -0.819920 3.098280  
C -2.778069 -2.801232 1.908153  
C -1.038010 -4.137900 0.691474  
C 1.153529 -4.151153 -0.541987

C 1.579480 -3.406117 -1.721369  
C 2.741138 -1.388653 -2.461374  
C 1.545564 0.513749 -3.120573  
C 0.436410 2.575323 -2.453709  
C -0.218669 3.851845 -0.569808  
C -0.960178 3.820983 0.656326  
C -2.717561 2.526784 1.881024  
C -3.100102 0.566084 3.092282  
C -2.073002 -1.548905 3.794769  
C -1.947837 -2.816571 3.108237  
C -0.281671 -4.197091 1.907765  
C 1.895096 -4.078227 0.679772  
C 2.751806 -2.598675 -1.695692  
C 3.492126 -0.221127 -2.030994  
C 2.756410 0.957991 -2.478559  
C 1.629279 2.997030 -1.756092  
C 1.220709 3.764090 -0.582253  
C -0.202097 3.881808 1.876095  
C -1.894273 2.542752 3.080794  
C -2.044004 1.282450 3.777987  
C -0.933554 -0.877117 4.352583  
C -0.731209 -3.490732 3.093901  
C 1.160819 -4.139586 1.906913  
C 3.122680 -3.316527 0.672506  
C 3.563431 -2.606621 -0.501005  
C 4.322270 -0.219886 -0.851912  
C 2.795808 2.171256 -1.728999  
C 1.957638 3.686617 0.639492  
C 1.238062 3.788108 1.870037  
C -0.664366 3.199921 3.067802  
C -0.919729 0.596307 4.344944  
C 0.332471 -1.622092 4.378850  
C 0.407588 -2.923083 3.779334  
C 1.591110 -3.376343 3.073621  
C 3.569811 -2.592626 1.834435  
C 4.328974 -1.447478 -0.077920  
C 4.426124 1.030880 -0.098641  
C 3.604243 2.160080 -0.525984  
C 3.155063 2.876697 0.639385  
C 1.658524 3.034471 3.046741  
C 0.462541 2.614546 3.757735  
C 0.361930 1.319161 4.366344  
C 1.562107 -0.884922 4.447507

C 2.762482 -2.569024 3.031720  
 C 4.336211 -1.438382 1.394798  
 C 4.438953 1.041736 1.388276  
 C 3.616941 2.175888 1.807296  
 C 2.813308 2.203553 3.019591  
 C 1.575686 0.558190 4.447238  
 C 2.753122 -1.350436 3.783618  
 C 4.343439 -0.202407 2.157777  
 C 2.779472 0.995600 3.782777  
 C 3.505468 -0.187252 3.332920  
 Y 2.415836 0.056677 0.691120  
 C -1.959920 2.310059 -4.970719  
 C -3.054143 1.776079 -4.026229  
 C -3.517014 0.539150 -4.701755  
 C -1.444168 1.020957 -5.534757  
 C -2.493177 0.073750 -5.523305  
 H -2.444694 2.908852 -5.778165  
 H -1.199208 2.956564 -4.491560  
 H -3.835744 2.488173 -3.703554  
 H -4.439186 -0.000892 -4.448142  
 H -0.478955 0.903429 -6.047294  
 H -2.466249 -0.908866 -6.015135

C -2.241699 2.618010 -2.117518  
 C -3.009258 2.582250 -0.901414  
 C -4.100488 0.682151 0.329471  
 C -3.811873 -1.480858 1.544683  
 C -2.623523 -3.335002 0.333847  
 C -0.589057 -4.134288 -0.884822  
 C 0.091178 -2.879462 -2.766900  
 C 1.238329 -0.850560 -3.470330  
 C 0.038602 1.360722 -3.407052  
 C -1.007124 3.235021 -2.102375  
 C -2.556493 3.202193 0.315796  
 C -3.785669 1.380613 1.536390  
 C -3.419066 -0.740520 2.741055  
 C -3.081881 -2.720476 1.548055  
 C -1.339856 -4.060952 0.335116  
 C 0.853213 -4.079407 -0.890458  
 C 1.278982 -3.327598 -2.067785  
 C 2.431412 -1.308150 -2.812151  
 C 1.239752 0.598901 -3.468153  
 C 0.131585 2.634438 -2.796802  
 C -0.524937 3.918172 -0.916688  
 C -1.266682 3.896411 0.309419  
 C -3.025513 2.606683 1.530982  
 C -3.408770 0.645313 2.736431  
 C -2.383150 -1.469687 3.439149  
 C -2.254437 -2.736532 2.749012  
 C -0.586398 -4.120190 1.555607  
 C 1.591678 -4.003515 0.332950  
 C 2.448030 -2.519620 -2.042199  
 C 3.183620 -0.139764 -2.372744  
 C 2.449825 1.037177 -2.815660  
 C 1.325209 3.066425 -2.093259  
 C 0.915205 3.833504 -0.926036  
 C -0.509271 3.960333 1.530051  
 C -2.203620 2.622425 2.733288  
 C -2.354304 1.361193 3.427445  
 C -1.244585 -0.799135 4.000878  
 C -1.039171 -3.413405 2.739960  
 C 0.854399 -4.063909 1.558502  
 C 2.816529 -3.238500 0.326818  
 C 3.256997 -2.526895 -0.846210  
 C 4.009281 -0.141194 -1.193238  
 C 2.491523 2.250043 -2.069369

## 21. P for Type B [6,6] 7-13 stepwise addition between Y@C<sub>2v</sub>-C<sub>82</sub> and Cp

Energy = -3355.44803751

NIMAG = 0  $\tilde{\nu}$  = 34.05

C -3.428090 -0.735149 -2.085922  
 C -2.368977 -1.478479 -2.780474  
 C -3.450849 0.638359 -2.102112  
 C -3.793216 -1.467299 -0.880972  
 C -2.245518 -2.739775 -2.080063  
 C -1.252199 -0.842362 -3.359777  
 C -2.591923 1.461230 -3.041291  
 C -3.765963 1.354246 -0.891724  
 C -4.120005 -0.784353 0.332853  
 C -3.066395 -2.710341 -0.878891  
 C -1.041095 -3.437830 -2.075292  
 C 0.005465 -1.580162 -3.374322  
 C -1.306275 0.666985 -3.706196

|   |           |           |           |
|---|-----------|-----------|-----------|
| C | 1.651843  | 3.763584  | 0.296637  |
| C | 0.930372  | 3.866427  | 1.525764  |
| C | -0.973464 | 3.279025  | 2.721680  |
| C | -1.230930 | 0.673926  | 3.995463  |
| C | 0.020935  | -1.544584 | 4.028573  |
| C | 0.097968  | -2.845896 | 3.428622  |
| C | 1.282962  | -3.300175 | 2.727478  |
| C | 3.261995  | -2.514693 | 1.489484  |
| C | 4.022787  | -1.369415 | -0.420580 |
| C | 4.115793  | 1.108215  | -0.437451 |
| C | 3.299157  | 2.238469  | -0.863957 |
| C | 2.850139  | 2.955385  | 0.298849  |
| C | 1.349445  | 3.111824  | 2.702446  |
| C | 0.152433  | 2.692618  | 3.412437  |
| C | 0.050914  | 1.396903  | 4.019721  |
| C | 1.250183  | -0.807797 | 4.098430  |
| C | 2.453539  | -2.492723 | 2.686462  |
| C | 4.031281  | -1.361014 | 1.052142  |
| C | 4.133614  | 1.119583  | 1.048905  |
| C | 3.312294  | 2.253915  | 1.467888  |
| C | 2.505014  | 2.280819  | 2.677251  |
| C | 1.264632  | 0.636001  | 4.101440  |
| C | 2.443636  | -1.273864 | 3.438755  |
| C | 4.041854  | -0.125997 | 1.818510  |
| C | 2.469423  | 1.072900  | 3.440198  |
| C | 3.196666  | -0.111135 | 2.989637  |
| Y | 2.109119  | 0.124097  | 0.377019  |
| C | -2.203145 | 2.290286  | -5.287477 |
| C | -3.379253 | 1.947322  | -4.351277 |
| C | -3.930020 | 0.697342  | -5.013031 |
| C | -1.637149 | 0.857010  | -5.279936 |
| C | -2.883926 | 0.042678  | -5.569392 |
| H | -2.548388 | 2.597891  | -6.294163 |
| H | -1.509548 | 3.052515  | -4.880927 |
| H | -4.102540 | 2.748484  | -4.113043 |
| H | -4.968592 | 0.347740  | -4.931921 |
| H | -0.745462 | 0.644650  | -5.897979 |
| H | -2.892503 | -0.952425 | -6.035083 |

## 22. RC for Type D [5,6] 8-15 concerted mechanism addition between La@C<sub>2v</sub>-C<sub>82</sub> and Cp

Energy = -3752.85303654

NIMAG = 0  $\tilde{\nu}$  = 9.87

|   |           |           |           |
|---|-----------|-----------|-----------|
| C | 3.678488  | 0.689696  | -2.293052 |
| C | 2.647296  | 1.393597  | -3.024895 |
| C | 3.687224  | -0.694596 | -2.272496 |
| C | 4.027329  | 1.448766  | -1.094707 |
| C | 2.481729  | 2.667915  | -2.355233 |
| C | 1.538622  | 0.700737  | -3.613882 |
| C | 2.667647  | -1.433229 | -2.986614 |
| C | 4.051869  | -1.417566 | -1.055534 |
| C | 4.315945  | 0.773891  | 0.133686  |
| C | 3.277742  | 2.677309  | -1.132807 |
| C | 1.257030  | 3.326203  | -2.389394 |
| C | 0.261046  | 1.425263  | -3.684839 |
| C | 1.549041  | -0.772420 | -3.593530 |
| C | 2.517838  | -2.689939 | -2.278537 |
| C | 3.317503  | -2.656456 | -1.058178 |
| C | 4.323978  | -0.701907 | 0.155242  |
| C | 3.967886  | 1.482619  | 1.326851  |
| C | 2.783939  | 3.304174  | 0.060643  |
| C | 0.761678  | 4.032550  | -1.221073 |
| C | 0.147333  | 2.731877  | -3.101743 |
| C | -0.951487 | 0.666101  | -3.779607 |
| C | 0.281712  | -1.517092 | -3.644385 |
| C | 1.304526  | -3.367219 | -2.296041 |
| C | 2.827438  | -3.250633 | 0.153374  |
| C | 3.991206  | -1.381030 | 1.365556  |
| C | 3.561302  | 0.757606  | 2.525914  |
| C | 3.217561  | 2.712815  | 1.293078  |
| C | 1.485012  | 4.000140  | 0.018414  |
| C | -0.677061 | 3.946432  | -1.258993 |
| C | -1.063249 | 3.165418  | -2.432426 |
| C | -2.173346 | 1.115483  | -3.159046 |
| C | -0.941231 | -0.778157 | -3.759706 |
| C | 0.186335  | -2.808170 | -3.024333 |
| C | 0.818725  | -4.047171 | -1.107434 |
| C | 1.541255  | -3.967652 | 0.131042  |
| C | 3.257346  | -2.624438 | 1.367140  |
| C | 3.570572  | -0.628279 | 2.543379  |

C 2.495154 1.479871 3.185431  
 C 2.362787 2.735978 2.474039  
 C 0.701407 4.066919 1.219444  
 C -1.439619 3.876689 -0.051932  
 C -2.222001 2.337970 -2.418422  
 C -2.921249 -0.055397 -2.717913  
 C -2.156749 -1.227504 -3.126282  
 C -1.017564 -3.239948 -2.342584  
 C -0.620422 -3.982581 -1.147668  
 C 0.758834 -4.014679 1.333641  
 C 2.401313 -2.625058 2.547467  
 C 2.515329 -1.347692 3.223363  
 C 1.358530 0.802154 3.736722  
 C 1.138178 3.393901 2.429746  
 C -0.737783 3.980762 1.188721  
 C -2.642003 3.076890 -0.070570  
 C -3.053972 2.340516 -1.233765  
 C -3.779675 -0.045378 -1.560670  
 C -2.188342 -2.429109 -2.351849  
 C -1.384392 -3.889865 0.057580  
 C -0.681951 -3.949816 1.300447  
 C 1.186176 -3.302383 2.523939  
 C 1.369081 -0.671210 3.756546  
 C 0.079375 1.527573 3.724757  
 C -0.005415 2.818112 3.102481  
 C -1.181632 3.232147 2.362687  
 C -3.112044 2.373037 1.090974  
 C -3.847946 1.199006 -0.811283  
 C -3.832128 -1.269602 -0.776872  
 C -3.020390 -2.410164 -1.167120  
 C -2.597451 -3.107155 0.016403  
 C -1.136277 -3.174945 2.452821  
 C 0.034314 -2.723365 3.179851  
 C 0.100370 -1.414916 3.765773  
 C -1.136783 0.770263 3.780004  
 C -2.338763 2.403792 2.314372  
 C -3.885729 1.219659 0.661837  
 C -3.869962 -1.249476 0.696615  
 C -3.078620 -2.378637 1.157819  
 C -2.305135 -2.364509 2.381564  
 C -1.126418 -0.673816 3.800257  
 C -2.326785 1.201612 3.088976  
 C -3.856995 -0.003884 1.448190

C -2.310151 -1.141101 3.121926  
 C -3.053660 0.018635 2.644553  
 La -1.728499 -0.015578 0.003927  
 C 5.997036 -3.392907 -2.835631  
 C 5.537912 -4.535747 -1.971051  
 C 6.010109 -4.347292 -0.700398  
 C 6.739812 -2.499294 -1.879316  
 C 6.754694 -3.088500 -0.643805  
 H 6.664950 -3.749597 -3.656319  
 H 5.157723 -2.875369 -3.354558  
 H 4.938089 -5.382575 -2.331480  
 H 5.845030 -5.015251 0.157158  
 H 7.208412 -1.546054 -2.159584  
 H 7.226186 -2.680969 0.262003

### 23. TS for Type D [5,6] 8-15 concerted mechanism addition between La@C<sub>2v</sub>-C<sub>82</sub> and Cp

Energy = -3752.84119288

NIMAG = 1  $\tilde{\nu}$  = -414.00

C 2.809754 1.055820 -2.170290  
 C 1.772634 1.767996 -2.886594  
 C 2.821087 -0.325476 -2.160654  
 C 3.183527 1.823735 -0.979756  
 C 1.625468 3.043707 -2.219547  
 C 0.654210 1.088719 -3.472445  
 C 1.773538 -1.041285 -2.836951  
 C 3.332744 -1.109184 -0.987226  
 C 3.457689 1.136831 0.244968  
 C 2.438540 3.050198 -1.007206  
 C 0.405657 3.712243 -2.243015  
 C -0.617430 1.823297 -3.535797  
 C 0.653799 -0.378411 -3.448725  
 C 1.619709 -2.298205 -2.135934  
 C 2.471610 -2.321515 -0.960373  
 C 3.452419 -0.328385 0.264623  
 C 3.133196 1.850512 1.443923  
 C 1.955019 3.681961 0.193240  
 C -0.074632 4.423444 -1.070874  
 C -0.715361 3.128297 -2.946817  
 C -1.835497 1.072273 -3.620096



C -0.616046 -1.116386 -3.496610  
 C 0.405179 -2.975212 -2.160396  
 C 1.955743 -2.878121 0.264668  
 C 3.131416 -1.001145 1.457296  
 C 2.736371 1.129218 2.641692  
 C 2.394025 3.089816 1.420191  
 C 0.659443 4.383948 0.162108  
 C -1.513815 4.346790 -1.095984  
 C -1.916471 3.570303 -2.267420  
 C -3.048917 1.529217 -2.987486  
 C -1.835086 -0.371647 -3.605243  
 C -0.713600 -2.407825 -2.877339  
 C -0.074840 -3.656746 -0.973920  
 C 0.661134 -3.581460 0.256079  
 C 2.401726 -2.265148 1.473226  
 C 2.731489 -0.257488 2.645581  
 C 1.682472 1.855494 3.315371  
 C 1.551973 3.115930 2.609794  
 C -0.113853 4.454993 1.370404  
 C -2.267485 4.280569 0.117683  
 C -3.080522 2.750281 -2.243482  
 C -3.800274 0.362440 -2.542196  
 C -3.048820 -0.814192 -2.960607  
 C -1.915484 -2.835755 -2.189269  
 C -1.514941 -3.586157 -1.002248  
 C -0.109373 -3.629240 1.465872  
 C 1.559012 -2.256776 2.655656  
 C 1.682304 -0.976263 3.329135  
 C 0.546494 1.179511 3.869604  
 C 0.329281 3.778631 2.576333  
 C -1.553801 4.377532 1.352129  
 C -3.476520 3.491028 0.108259  
 C -3.901844 2.757793 -1.052181  
 C -4.647926 0.375712 -1.376563  
 C -3.082227 -2.016437 -2.188564  
 C -2.265833 -3.489753 0.211548  
 C -1.553433 -3.558348 1.447173  
 C 0.335085 -2.927447 2.651094  
 C 0.547381 -0.294858 3.880726  
 C -0.727938 1.912302 3.873241  
 C -0.811245 3.206415 3.257025  
 C -1.991545 3.628928 2.528922  
 C -3.937669 2.785230 1.272728

C -4.693846 1.617501 -0.623808  
 C -4.708278 -0.851375 -0.595964  
 C -3.903958 -1.994648 -0.996176  
 C -3.472476 -2.695672 0.182555  
 C -1.988250 -2.782344 2.602895  
 C -0.804365 -2.340171 3.318086  
 C -0.725189 -1.031847 3.903912  
 C -1.947214 1.161022 3.936326  
 C -3.153017 2.806827 2.488269  
 C -4.717613 1.635244 0.848271  
 C -4.732141 -0.834302 0.879082  
 C -3.939655 -1.968301 1.330173  
 C -3.152597 -1.962863 2.546039  
 C -1.945983 -0.283156 3.954627  
 C -3.141735 1.602200 3.259655  
 C -4.696311 0.410742 1.631987  
 C -3.140761 -0.740725 3.287672  
 C -3.880632 0.425003 2.820314  
 La -2.581488 0.339893 0.169012  
 C 4.802824 -2.758428 -2.521524  
 C 4.418637 -3.970707 -1.725586  
 C 4.986761 -3.869216 -0.455430  
 C 5.177612 -1.773380 -1.423707  
 C 5.515544 -2.565464 -0.284064  
 H 5.732771 -2.986486 -3.098560  
 H 4.053474 -2.408228 -3.258108  
 H 3.903306 -4.848966 -2.137996  
 H 4.963129 -4.648659 0.318990  
 H 5.682623 -0.821422 -1.650989  
 H 5.980126 -2.184321 0.635563

**24. P for Type D [5,6] 8-15 concerted  
 mechanism addition between  
 La@C<sub>2v</sub>-C<sub>82</sub> and Cp**

Energy = -3752.87692143

NIMAG = 0  $\tilde{\nu}$  = 23.10

C 3.597642 0.676729 -2.329331  
 C 2.556597 1.391465 -3.030562  
 C 3.605104 -0.703936 -2.310415  
 C 3.987593 1.449690 -1.145231  
 C 2.420212 2.671698 -2.368285

|   |           |           |           |    |           |           |           |
|---|-----------|-----------|-----------|----|-----------|-----------|-----------|
| C | 1.434258  | 0.719714  | -3.614929 | C  | 2.475169  | -1.363882 | 3.130414  |
| C | 2.541058  | -1.412287 | -2.946342 | C  | 1.356080  | 0.788916  | 3.702778  |
| C | 4.284278  | -1.511470 | -1.214060 | C  | 1.141372  | 3.396322  | 2.428791  |
| C | 4.265168  | 0.754985  | 0.074970  | C  | -0.745709 | 4.005408  | 1.212685  |
| C | 3.242881  | 2.676582  | -1.164580 | C  | -2.676041 | 3.129761  | -0.028412 |
| C | 1.202047  | 3.344149  | -2.391176 | C  | -3.102422 | 2.397458  | -1.189608 |
| C | 0.168223  | 1.460966  | -3.685093 | C  | -3.854391 | 0.015499  | -1.519846 |
| C | 1.426337  | -0.741232 | -3.578621 | C  | -2.294353 | -2.377367 | -2.344227 |
| C | 2.416065  | -2.689547 | -2.313690 | C  | -1.480204 | -3.865746 | 0.049532  |
| C | 3.445924  | -2.907441 | -1.214074 | C  | -0.769965 | -3.940873 | 1.281281  |
| C | 4.270995  | -0.712212 | 0.082295  | C  | 1.121540  | -3.315535 | 2.472650  |
| C | 3.936589  | 1.464301  | 1.275402  | C  | 1.350717  | -0.685941 | 3.704271  |
| C | 2.761649  | 3.305600  | 0.040719  | C  | 0.083996  | 1.524686  | 3.718537  |
| C | 0.726009  | 4.052413  | -1.213582 | C  | 0.002536  | 2.823308  | 3.109759  |
| C | 0.078051  | 2.766959  | -3.093420 | C  | -1.179171 | 3.249942  | 2.386559  |
| C | -1.051257 | 0.714746  | -3.770458 | C  | -3.130489 | 2.416306  | 1.134315  |
| C | 0.166625  | -1.473492 | -3.645796 | C  | -3.889249 | 1.252446  | -0.761940 |
| C | 1.196905  | -3.343862 | -2.328100 | C  | -3.920711 | -1.217178 | -0.744269 |
| C | 2.736775  | -3.275671 | 0.085305  | C  | -3.117189 | -2.359006 | -1.149928 |
| C | 3.921140  | -1.378155 | 1.254053  | C  | -2.682464 | -3.064264 | 0.025011  |
| C | 3.541726  | 0.739801  | 2.465564  | C  | -1.199052 | -3.167308 | 2.443555  |
| C | 3.203058  | 2.711150  | 1.262643  | C  | -0.011699 | -2.730172 | 3.154205  |
| C | 1.465466  | 4.008945  | 0.015806  | C  | 0.077604  | -1.421825 | 3.737780  |
| C | -0.712760 | 3.982115  | -1.234968 | C  | -1.136153 | 0.776056  | 3.783485  |
| C | -1.118652 | 3.206740  | -2.406796 | C  | -2.342771 | 2.430122  | 2.346866  |
| C | -2.262902 | 1.172063  | -3.132952 | C  | -3.908308 | 1.265538  | 0.708043  |
| C | -1.053626 | -0.728666 | -3.759075 | C  | -3.940937 | -1.204551 | 0.731242  |
| C | 0.072989  | -2.763218 | -3.027458 | C  | -3.147994 | -2.340928 | 1.176458  |
| C | 0.707978  | -4.051554 | -1.148764 | C  | -2.359408 | -2.342436 | 2.392115  |
| C | 1.447732  | -3.965920 | 0.081337  | C  | -1.139805 | -0.668672 | 3.797534  |
| C | 3.160358  | -2.645470 | 1.259203  | C  | -2.332627 | 1.222851  | 3.114080  |
| C | 3.526499  | -0.648119 | 2.448947  | C  | -3.892906 | 0.040025  | 1.487513  |
| C | 2.492016  | 1.463622  | 3.148740  | C  | -2.338543 | -1.120908 | 3.135253  |
| C | 2.363720  | 2.731047  | 2.452114  | C  | -3.076031 | 0.048941  | 2.674035  |
| C | 0.694921  | 4.076930  | 1.226216  | La | -1.780520 | -0.078506 | 0.017087  |
| C | -1.463921 | 3.914324  | -0.019441 | C  | 5.410819  | -3.136075 | -2.616887 |
| C | -2.286350 | 2.389246  | -2.382592 | C  | 4.586394  | -3.961554 | -1.604479 |
| C | -3.013139 | 0.004759  | -2.689133 | C  | 5.546127  | -4.007651 | -0.425707 |
| C | -2.264298 | -1.172899 | -3.113506 | C  | 5.750408  | -2.020521 | -1.603638 |
| C | -1.127515 | -3.195552 | -2.346707 | C  | 6.242594  | -2.846667 | -0.425140 |
| C | -0.724835 | -3.962540 | -1.167218 | H  | 6.314816  | -3.677872 | -2.957183 |
| C | 0.674464  | -4.011991 | 1.291590  | H  | 4.831463  | -2.788485 | -3.495177 |
| C | 2.338412  | -2.638059 | 2.455792  | H  | 4.157848  | -4.922706 | -1.943438 |

H 5.568092 -4.796461 0.338870  
H 6.397397 -1.190236 -1.942040  
H 6.949118 -2.495584 0.339585

## 25. RC for Type B [6,6] 7-13 stepwise addition between La@C<sub>2v</sub>-C<sub>82</sub> and Cp

Energy = -3752.85449635

NIMAG = 0  $\tilde{\nu}$  = 15.75

C 3.528392 0.775416 -1.999289  
C 2.495486 1.504597 -2.708226  
C 3.523695 -0.608001 -2.009693  
C 3.889522 1.500964 -0.786151  
C 2.342073 2.762144 -2.005409  
C 1.373571 0.832244 -3.291851  
C 2.494248 -1.323042 -2.736921  
C 3.886755 -1.359617 -0.814612  
C 4.186792 0.795899 0.423472  
C 3.146367 2.735406 -0.788221  
C 1.121345 3.430740 -2.012873  
C 0.102268 1.567000 -3.340850  
C 1.371496 -0.639716 -3.306894  
C 2.341175 -2.596959 -2.059131  
C 3.145161 -2.595650 -0.843203  
C 4.186264 -0.680992 0.408794  
C 3.848866 1.475934 1.635799  
C 2.666686 3.335203 0.423671  
C 0.640273 4.109378 -0.823440  
C 0.001530 2.861293 -2.729513  
C -1.116545 0.818228 -3.446139  
C 0.100595 -1.373811 -3.367305  
C 1.122057 -3.266579 -2.082550  
C 2.666795 -3.222484 0.355332  
C 3.849277 -1.387593 1.606412  
C 3.444662 0.723933 2.820392  
C 3.106482 2.710282 1.638288  
C 1.372684 4.041395 0.409457  
C -0.800189 4.033548 -0.851361  
C -1.202032 3.286399 -2.040621  
C -2.331321 1.261317 -2.807435  
C -1.117788 -0.625880 -3.461519

C 0.001010 -2.682898 -2.788530  
C 0.640732 -3.971726 -0.908065  
C 1.373519 -3.929130 0.325751  
C 3.106337 -2.622044 1.582494  
C 3.445015 -0.661320 2.806182  
C 2.389936 1.437964 3.506842  
C 2.260979 2.710698 2.826830  
C 0.599455 4.083800 1.618130  
C -1.552628 3.938536 0.359928  
C -2.366186 2.466616 -2.038030  
C -3.084814 0.085107 -2.389620  
C -2.332317 -1.082327 -2.831781  
C -1.201086 -3.123138 -2.108078  
C -0.799710 -3.896306 -0.935080  
C 0.599750 -3.996725 1.533055  
C 2.261220 -2.648462 2.770229  
C 2.389804 -1.390072 3.477054  
C 1.252442 0.754432 4.050352  
C 1.040740 3.377773 2.807664  
C -0.840704 4.007740 1.597043  
C -2.759938 3.145572 0.331550  
C -3.189788 2.444066 -0.846533  
C -3.933923 0.072674 -1.225337  
C -2.366257 -2.303183 -2.086875  
C -1.553769 -3.828081 0.277876  
C -0.840509 -3.921520 1.513456  
C 1.041095 -3.315758 2.736816  
C 1.252303 -0.718779 4.034428  
C -0.021510 1.488447 4.065919  
C -0.101861 2.793781 3.475577  
C -1.281190 3.234446 2.755961  
C -3.229350 2.419726 1.479555  
C -3.994160 1.301029 -0.446236  
C -3.981727 -1.168096 -0.471139  
C -3.187707 -2.308409 -0.896539  
C -2.763623 -3.039956 0.266016  
C -1.280613 -3.172662 2.687964  
C -0.101663 -2.746408 3.416582  
C -0.021905 -1.453823 4.034328  
C -1.242797 0.738227 4.112585  
C -2.444901 2.415907 2.697232  
C -4.020084 1.285582 1.028510  
C -4.007517 -1.183882 1.001378

C -3.226858 -2.333020 1.428603  
 C -2.443991 -2.352505 2.645116  
 C -1.243305 -0.705427 4.097035  
 C -2.434552 1.194646 3.441027  
 C -3.986702 0.040876 1.783270  
 C -2.435384 -1.147770 3.416016  
 C -3.173828 0.028158 2.973564  
 La -1.869610 0.104858 0.322731  
 C 2.613359 -2.402580 -5.784847  
 C 3.906688 -1.814057 -5.286007  
 C 3.910947 -0.468997 -5.543485  
 C 1.856425 -1.208624 -6.299187  
 C 2.641140 -0.094706 -6.166450  
 H 2.797051 -3.145124 -6.598425  
 H 2.057062 -2.966889 -5.001723  
 H 4.715438 -2.397902 -4.825947  
 H 4.722196 0.233409 -5.304452  
 H 0.843808 -1.252994 -6.722837  
 H 2.366256 0.928701 -6.459337

C 3.478264 1.593595 1.946207  
 C 2.271405 3.446859 0.748994  
 C 0.231451 4.217261 -0.477523  
 C -0.421583 2.978444 -2.378027  
 C -1.536816 0.936020 -3.091037  
 C -0.304200 -1.239420 -3.024237  
 C 0.740869 -3.138109 -1.774440  
 C 2.292779 -3.100305 0.649276  
 C 3.486488 -1.268839 1.899999  
 C 3.086473 0.832996 3.128891  
 C 2.727712 2.822045 1.958650  
 C 0.974279 4.147173 0.750158  
 C -1.211374 4.136555 -0.491226  
 C -1.623449 3.398286 -1.679857  
 C -2.753264 1.373169 -2.445587  
 C -1.530745 -0.503402 -3.111874  
 C -0.396805 -2.559651 -2.468396  
 C 0.269510 -3.848724 -0.598518  
 C 1.009669 -3.815930 0.629193  
 C 2.745035 -2.506617 1.874400  
 C 3.092491 -0.552788 3.107547  
 C 2.034552 1.539457 3.828433  
 C 1.893774 2.813196 3.156059  
 C 0.213254 4.182532 1.965589  
 C -1.951222 4.033374 0.727010  
 C -2.784897 2.574267 -1.670837  
 C -3.494987 0.191969 -2.027585  
 C -2.739388 -0.969609 -2.478043  
 C -1.586297 -3.006353 -1.779791  
 C -1.171082 -3.782075 -0.613733  
 C 0.247308 -3.897281 1.843929  
 C 1.915405 -2.545914 3.070247  
 C 2.045132 -1.291042 3.782243  
 C 0.903514 0.845928 4.376388  
 C 0.668092 3.472024 3.147140  
 C -1.228193 4.099984 1.957607  
 C -3.156371 3.234800 0.707059  
 C -3.598188 2.540645 -0.471035  
 C -4.328934 0.168002 -0.852091  
 C -2.760736 -2.193282 -1.740618  
 C -1.917851 -3.728889 0.605410  
 C -1.193937 -3.826649 1.835497  
 C 0.696495 -3.219983 3.044624

## 26. TS1 for Type B [6,6] 7-13 stepwise addition between La@C<sub>2v</sub>-C<sub>82</sub> and Cp

Energy = -3752.84253039

NIMAG = 1  $\tilde{\nu}$  = -394.83

C 3.126656 0.903744 -1.691694  
 C 2.089874 1.638393 -2.401717  
 C 3.132658 -0.473242 -1.706867  
 C 3.489354 1.624428 -0.477471  
 C 1.929737 2.882528 -1.686072  
 C 0.955244 0.952183 -2.956288  
 C 2.183453 -1.233683 -2.563736  
 C 3.478687 -1.216401 -0.520968  
 C 3.805624 0.920269 0.726905  
 C 2.740488 2.853044 -0.470345  
 C 0.702969 3.548929 -1.672528  
 C -0.320282 1.685579 -2.989568  
 C 0.960929 -0.509243 -3.004156  
 C 1.960119 -2.476921 -1.769094  
 C 2.744354 -2.457424 -0.554307  
 C 3.804964 -0.551645 0.705823

|    |           |           |           |   |           |           |           |
|----|-----------|-----------|-----------|---|-----------|-----------|-----------|
| C  | 0.909203  | -0.627233 | 4.351956  | C | 3.506999  | 0.813936  | -2.050157 |
| C  | -0.372925 | 1.572911  | 4.405413  | C | 2.474967  | 1.554904  | -2.760321 |
| C  | -0.464988 | 2.880126  | 3.822360  | C | 3.521767  | -0.562868 | -2.073799 |
| C  | -1.654359 | 3.319422  | 3.115134  | C | 3.870758  | 1.529630  | -0.831331 |
| C  | -3.616989 | 2.505009  | 1.856431  | C | 2.308090  | 2.784888  | -2.037411 |
| C  | -4.397680 | 1.394478  | -0.068691 | C | 1.327734  | 0.860077  | -3.308592 |
| C  | -4.357602 | -1.074589 | -0.106071 | C | 2.611253  | -1.346636 | -3.001500 |
| C  | -3.570722 | -2.213830 | -0.546891 | C | 3.846396  | -1.303486 | -0.889984 |
| C  | -3.135701 | -2.952961 | 0.608729  | C | 4.188322  | 0.823398  | 0.369934  |
| C  | -1.627250 | -3.088085 | 3.017219  | C | 3.119578  | 2.754319  | -0.819239 |
| C  | -0.442196 | -2.658644 | 3.736573  | C | 1.077173  | 3.452211  | -2.015210 |
| C  | -0.362161 | -1.368449 | 4.358261  | C | 0.049333  | 1.598874  | -3.337747 |
| C  | -1.591246 | 0.816092  | 4.458174  | C | 1.323099  | -0.582455 | -3.345820 |
| C  | -2.815469 | 2.496932  | 3.064120  | C | 2.339757  | -2.572198 | -2.137904 |
| C  | -4.413746 | 1.371736  | 1.407445  | C | 3.114511  | -2.547336 | -0.925873 |
| C  | -4.372432 | -1.098975 | 1.364946  | C | 4.182442  | -0.647072 | 0.343003  |
| C  | -3.588644 | -2.252137 | 1.778741  | C | 3.864239  | 1.491508  | 1.593258  |
| C  | -2.793515 | -2.271771 | 2.986487  | C | 2.651859  | 3.344586  | 0.402147  |
| C  | -1.586398 | -0.625378 | 4.434830  | C | 0.609148  | 4.117106  | -0.821841 |
| C  | -2.790210 | 1.270134  | 3.798386  | C | -0.049421 | 2.888376  | -2.722245 |
| C  | -4.360688 | 0.119632  | 2.153093  | C | -1.166491 | 0.853231  | -3.445737 |
| C  | -2.783784 | -1.069800 | 3.761902  | C | 0.074056  | -1.312241 | -3.383349 |
| C  | -3.531991 | 0.103822  | 3.334198  | C | 1.122178  | -3.227422 | -2.144383 |
| La | -2.252875 | 0.266210  | 0.703269  | C | 2.669756  | -3.198776 | 0.278009  |
| C  | 2.043200  | -2.261738 | -5.051997 | C | 3.863234  | -1.368790 | 1.530298  |
| C  | 3.175516  | -1.707160 | -4.195538 | C | 3.470613  | 0.726151  | 2.770193  |
| C  | 3.530483  | -0.448177 | -4.775090 | C | 3.110769  | 2.718523  | 1.610024  |
| C  | 1.521270  | -1.025757 | -5.719630 | C | 1.352960  | 4.043570  | 0.406979  |
| C  | 2.477331  | -0.019099 | -5.624265 | C | -0.835978 | 4.039358  | -0.833919 |
| H  | 2.498478  | -2.930856 | -5.823195 | C | -1.252018 | 3.310133  | -2.024591 |
| H  | 1.285397  | -2.873014 | -4.522037 | C | -2.385911 | 1.289351  | -2.795187 |
| H  | 3.934075  | -2.375201 | -3.758377 | C | -1.159708 | -0.581251 | -3.472709 |
| H  | 4.409425  | 0.148999  | -4.496929 | C | -0.020535 | -2.641041 | -2.834009 |
| H  | 0.573265  | -0.970560 | -6.272241 | C | 0.649546  | -3.941416 | -0.970277 |
| H  | 2.407471  | 0.973652  | -6.090732 | C | 1.390140  | -3.916607 | 0.256763  |
|    |           |           |           | C | 3.124061  | -2.610598 | 1.503018  |
|    |           |           |           | C | 3.475020  | -0.659577 | 2.744349  |
|    |           |           |           | C | 2.418124  | 1.430766  | 3.474178  |
|    |           |           |           | C | 2.278705  | 2.706676  | 2.809366  |
|    |           |           |           | C | 0.594827  | 4.077354  | 1.621559  |
|    |           |           |           | C | -1.573795 | 3.933319  | 0.384934  |
|    |           |           |           | C | -2.415436 | 2.487442  | -2.017711 |
|    |           |           |           | C | -3.125054 | 0.108423  | -2.382597 |

**27. INT for Type B [6,6] 7-13 stepwise addition between La@C<sub>2v</sub>-C<sub>82</sub> and Cp**

Energy = -3752.84613926

NIMAG = 0  $\tilde{\nu}$  = 16.72

C -2.366691 -1.051117 -2.838378  
 C -1.203317 -3.087007 -2.149721  
 C -0.788492 -3.870661 -0.984741  
 C 0.628560 -4.001282 1.471777  
 C 2.298318 -2.653846 2.699375  
 C 2.428627 -1.400591 3.415287  
 C 1.287993 0.733947 4.019170  
 C 1.050708 3.362504 2.800210  
 C -0.848916 3.995033 1.614893  
 C -2.780552 3.135844 0.364021  
 C -3.228420 2.448868 -0.816726  
 C -3.958856 0.077381 -1.205572  
 C -2.383612 -2.274314 -2.104067  
 C -1.536255 -3.824508 0.233203  
 C -0.812331 -3.929063 1.463616  
 C 1.079006 -3.328435 2.673936  
 C 1.293377 -0.739573 3.989071  
 C 0.011094 1.460121 4.052179  
 C -0.080954 2.768518 3.473668  
 C -1.272395 3.209992 2.767248  
 C -3.239901 2.402159 1.511386  
 C -4.029992 1.302041 -0.417703  
 C -3.977471 -1.167301 -0.465197  
 C -3.193583 -2.306396 -0.913607  
 C -2.756342 -3.051083 0.239667  
 C -1.244824 -3.195950 2.648739  
 C -0.059049 -2.768915 3.368386  
 C 0.021966 -1.480645 3.994010  
 C -1.207502 0.702870 4.104886  
 C -2.434217 2.388255 2.716796  
 C -4.039847 1.271964 1.059141  
 C -3.986631 -1.197927 1.004549  
 C -3.205553 -2.355455 1.412355  
 C -2.409809 -2.378763 2.619943  
 C -1.202028 -0.737399 4.073959  
 C -2.406444 1.158810 3.446428  
 C -3.976572 0.015243 1.797268  
 C -2.400682 -1.179992 3.399973  
 C -3.148950 -0.005568 2.978945  
 La -1.874747 0.209347 0.328643  
 C 2.442128 -2.416211 -5.366733  
 C 3.421586 -1.735963 -4.381051  
 C 3.824254 -0.488392 -5.090521

C 1.992868 -1.272857 -6.227147  
 C 2.894444 -0.208225 -6.100086  
 H 3.006744 -3.155231 -5.984879  
 H 1.619281 -2.983401 -4.885679  
 H 4.264251 -2.370869 -4.044846  
 H 4.643281 0.167579 -4.766414  
 H 1.126859 -1.306072 -6.903211  
 H 2.862626 0.720747 -6.687606

## 28. TS2 for Type B [6,6] 7-13 stepwise addition between La@C<sub>2v</sub>-C<sub>82</sub> and Cp

Energy = -3752.84593510

NIMAG = 1  $\tilde{\nu}$  = -118.31

C 3.128075 0.864954 -1.721627  
 C 2.089211 1.599215 -2.436821  
 C 3.138313 -0.510035 -1.727980  
 C 3.492750 1.595585 -0.514560  
 C 1.934989 2.847497 -1.731290  
 C 0.948565 0.911317 -2.977613  
 C 2.233946 -1.303468 -2.647849  
 C 3.465279 -1.236287 -0.533162  
 C 3.812464 0.904920 0.695640  
 C 2.747703 2.826207 -0.517007  
 C 0.710062 3.520632 -1.718101  
 C -0.323303 1.649263 -3.013509  
 C 0.956370 -0.547253 -3.059164  
 C 1.952720 -2.513799 -1.766813  
 C 2.727057 -2.475269 -0.553420  
 C 3.803087 -0.564475 0.688168  
 C 3.492806 1.592048 1.910317  
 C 2.285956 3.434817 0.697946  
 C 0.245548 4.201861 -0.529052  
 C -0.417832 2.949619 -2.414491  
 C -1.541344 0.906751 -3.114200  
 C -0.315560 -1.267419 -3.026831  
 C 0.729477 -3.157724 -1.757876  
 C 2.279744 -3.107900 0.659524  
 C 3.487147 -1.270843 1.888647  
 C 3.100000 0.842992 3.099358  
 C 2.744809 2.821690 1.912549

C 0.991029 4.141550 0.695639  
 C -1.200838 4.127835 -0.538813  
 C -1.615584 3.378339 -1.717459  
 C -2.758935 1.354380 -2.472273  
 C -1.539306 -0.532075 -3.120056  
 C -0.412170 -2.581539 -2.457433  
 C 0.254547 -3.855015 -0.575207  
 C 0.997532 -3.820680 0.648990  
 C 2.739250 -2.505951 1.876112  
 C 3.099899 -0.543065 3.090345  
 C 2.051945 1.560909 3.795468  
 C 1.913497 2.827085 3.113227  
 C 0.233835 4.195266 1.914552  
 C -1.939286 4.045865 0.682172  
 C -2.778551 2.555789 -1.698456  
 C -3.503465 0.179444 -2.054603  
 C -2.751996 -0.988723 -2.482104  
 C -1.596675 -3.015296 -1.763444  
 C -1.184632 -3.784392 -0.590501  
 C 0.236473 -3.890625 1.865641  
 C 1.914276 -2.533129 3.075563  
 C 2.051617 -1.273652 3.774756  
 C 0.918738 0.873800 4.350391  
 C 0.688704 3.492046 3.099812  
 C -1.208146 4.116487 1.908433  
 C -3.154343 3.256236 0.680059  
 C -3.579065 2.538235 -0.490040  
 C -4.268967 0.166351 -0.840737  
 C -2.776008 -2.203073 -1.729691  
 C -1.935571 -3.728565 0.627607  
 C -1.204892 -3.814644 1.857177  
 C 0.691978 -3.205080 3.057895  
 C 0.918293 -0.599553 4.338383  
 C -0.352924 1.605157 4.367799  
 C -0.444244 2.907091 3.778558  
 C -1.638367 3.342565 3.069174  
 C -3.649954 2.560944 1.844472  
 C -4.360244 1.395314 -0.069904  
 C -4.313866 -1.063009 -0.097328  
 C -3.587850 -2.231041 -0.541597  
 C -3.162804 -2.967454 0.625942  
 C -1.634228 -3.066306 3.032850  
 C -0.443295 -2.632214 3.744776

C -0.354421 -1.336127 4.346165  
 C -1.575694 0.851684 4.411471  
 C -2.815664 2.537636 3.033573  
 C -4.440282 1.405464 1.401201  
 C -4.340938 -1.067334 1.366369  
 C -3.601610 -2.250445 1.792077  
 C -2.798428 -2.249316 2.988741  
 C -1.576350 -0.583665 4.398756  
 C -2.787948 1.306195 3.767778  
 C -4.389869 0.148057 2.151529  
 C -2.782744 -1.027881 3.741716  
 C -3.553797 0.139702 3.339064  
 La -2.174305 0.515194 1.053870  
 C 1.986340 -2.278177 -4.978029  
 C 3.072672 -1.742329 -4.025262  
 C 3.533720 -0.500433 -4.693931  
 C 1.470023 -0.990603 -5.544891  
 C 2.513269 -0.037763 -5.521494  
 H 2.478260 -2.874793 -5.782755  
 H 1.224233 -2.927176 -4.504519  
 H 3.856585 -2.452151 -3.703098  
 H 4.451517 0.043327 -4.432544  
 H 0.506982 -0.875663 -6.061952  
 H 2.484996 0.946094 -6.010762

## 29. P for Type B [6,6] 7-13 stepwise addition between La@C<sub>2v</sub>-C<sub>82</sub> and Cp

Energy = -3752.86680119

NIMAG = 0  $\tilde{\nu}$  = 35.59

C 3.482535 0.709799 -2.140072  
 C 2.414801 1.441488 -2.834466  
 C 3.516484 -0.663353 -2.155363  
 C 3.839931 1.445903 -0.935501  
 C 2.278275 2.701967 -2.134791  
 C 1.306044 0.792374 -3.414682  
 C 2.667595 -1.495086 -3.094700  
 C 3.840372 -1.376609 -0.945284  
 C 4.173232 0.766588 0.278288  
 C 3.097981 2.680453 -0.933361  
 C 1.065043 3.385941 -2.130929

C 0.040250 1.515095 -3.430779  
 C 1.375265 -0.716216 -3.759543  
 C 2.329552 -2.656073 -2.170844  
 C 3.098671 -2.612446 -0.955330  
 C 4.169209 -0.699892 0.274884  
 C 3.858523 1.460103 1.490746  
 C 2.648063 3.299813 0.279917  
 C 0.605451 4.075301 -0.939308  
 C -0.059695 2.814785 -2.823994  
 C -1.181789 0.769746 -3.528939  
 C 0.037540 -1.424945 -3.461586  
 C 1.102576 -3.285529 -2.154187  
 C 2.651987 -3.239077 0.261365  
 C 3.861493 -1.402519 1.481365  
 C 3.473378 0.715159 2.686148  
 C 3.112699 2.690841 1.493985  
 C 1.355875 4.011972 0.280199  
 C -0.838502 4.000087 -0.945293  
 C -1.253713 3.242104 -2.121463  
 C -2.385450 1.213060 -2.875538  
 C -1.170250 -0.679784 -3.521241  
 C -0.042989 -2.701317 -2.851647  
 C 0.626558 -3.976340 -0.969758  
 C 1.370860 -3.948986 0.254089  
 C 3.114303 -2.636412 1.475162  
 C 3.475235 -0.670771 2.680247  
 C 2.428085 1.433732 3.383380  
 C 2.285108 2.698204 2.695895  
 C 0.602016 4.066500 1.503238  
 C -1.573415 3.916703 0.277572  
 C -2.411434 2.417944 -2.099600  
 C -3.129521 0.037533 -2.445737  
 C -2.380398 -1.129312 -2.870225  
 C -1.227551 -3.144016 -2.149092  
 C -0.813233 -3.910005 -0.981266  
 C 0.611214 -4.020680 1.471688  
 C 2.291463 -2.662140 2.677487  
 C 2.429253 -1.400471 3.371658  
 C 1.296346 0.748156 3.943479  
 C 1.061138 3.364939 2.687576  
 C -0.838442 3.988179 1.501698  
 C -2.785521 3.123440 0.278200  
 C -3.209450 2.401264 -0.889873

C -3.895368 0.027858 -1.234391  
 C -2.406852 -2.342289 -2.118623  
 C -1.563814 -3.860629 0.237935  
 C -0.830051 -3.945187 1.465722  
 C 1.068971 -3.333671 2.662605  
 C 1.296820 -0.725006 3.935635  
 C 0.024563 1.479205 3.962419  
 C -0.069589 2.780465 3.370814  
 C -1.265651 3.215132 2.665849  
 C -3.278051 2.429588 1.444827  
 C -3.989199 1.259403 -0.465565  
 C -3.942998 -1.200009 -0.487247  
 C -3.219789 -2.369353 -0.928642  
 C -2.792930 -3.103501 0.237971  
 C -1.257351 -3.194527 2.640190  
 C -0.065207 -2.759458 3.350012  
 C 0.024117 -1.462163 3.948231  
 C -1.197359 0.725539 4.009752  
 C -2.441903 2.409272 2.633028  
 C -4.067658 1.272789 1.005079  
 C -3.968993 -1.201037 0.976805  
 C -3.230131 -2.382658 1.404156  
 C -2.423055 -2.378020 2.597564  
 C -1.198059 -0.710421 4.002059  
 C -2.412200 1.178998 3.369433  
 C -4.016241 0.017251 1.759235  
 C -2.405260 -1.155772 3.348613  
 C -3.177839 0.011840 2.944469  
 La -1.802250 0.380289 0.657478  
 C 2.290758 -2.327585 -5.340876  
 C 3.462609 -1.972527 -4.403672  
 C 4.000820 -0.716751 -5.064756  
 C 1.709965 -0.900375 -5.334009  
 C 2.948304 -0.073376 -5.622352  
 H 2.640128 -2.631936 -6.347171  
 H 1.604419 -3.096362 -4.934498  
 H 4.193937 -2.766045 -4.164498  
 H 5.035558 -0.355724 -4.982488  
 H 0.815736 -0.697637 -5.951390  
 H 2.947050 0.921444 -6.088777

### 30. RC for Type A [6,6] 61-62



**concerted mechanism addition  
between La@C<sub>2</sub>-C<sub>72</sub> and Cp**

Energy = -3371.90393245

NIMAG = 0  $\tilde{\nu}$  = 22.13

C -3.947317 0.776437 -0.120283  
C -3.976906 -0.445776 0.589660  
C -3.499133 -0.513673 1.950166  
C -2.835159 -1.811617 2.120073  
C -1.818605 -2.005414 3.104360  
C -0.688526 -2.827236 2.715159  
C 0.660462 -2.542817 3.190421  
C 1.582302 -2.779762 2.109833  
C 2.735743 -1.936708 1.888331  
C 3.259269 -1.945277 0.559349  
C 3.928425 -0.784462 0.005356  
C 3.705281 -0.758561 -1.429797  
C 3.442218 0.465382 -2.090866  
C 2.480070 0.517663 -3.179221  
C 1.723217 1.763100 -3.035912  
C 0.386209 1.826870 -3.427974  
C -0.575171 2.547907 -2.616260  
C -1.875252 1.930391 -2.830093  
C -2.851579 1.957519 -1.821723  
C -3.670909 0.784587 -1.546343  
C -3.299058 1.923063 0.485274  
C -2.562448 2.620548 -0.570790  
C -1.268689 3.179041 -0.327055  
C -0.211080 3.097942 -1.345747  
C 1.203088 3.042322 -0.931381  
C 2.149439 2.421585 -1.813806  
C 3.289843 1.679100 -1.301099  
C 3.552761 1.657417 0.077966  
C 3.931001 0.420185 0.745070  
C 3.403862 0.455748 2.088372  
C 2.876490 -0.721357 2.716959  
C 1.951762 -0.513220 3.823407  
C 0.895355 -1.480236 4.112985  
C -0.258048 -0.762900 4.611349  
C -1.589537 -0.931394 4.052380  
C -2.112182 0.412571 3.759988  
C -2.995674 0.647694 2.625604  
C -2.825073 1.882588 1.832229

C -1.681518 2.720170 2.116296  
C -0.885246 3.289025 1.045865  
C 0.494623 3.280764 1.453823  
C 1.547367 3.092711 0.498364  
C 2.728395 2.427336 0.977248  
C 2.733397 1.749608 2.264789  
C 1.681079 1.919869 3.215391  
C 1.418044 0.823572 4.128290  
C 0.067116 0.642392 4.634009  
C -1.067383 1.371828 4.110685  
C -0.799561 2.456331 3.223562  
C 0.565835 2.751559 2.805119  
C -3.574478 -1.666905 -0.092528  
C -2.783009 -2.458293 0.817434  
C -1.584525 -3.111529 0.366031  
C -0.567471 -3.323204 1.354607  
C 0.826243 -3.321660 0.997331  
C 1.260033 -3.179100 -0.357557  
C 2.561943 -2.616334 -0.539794  
C 2.897103 -1.923668 -1.762846  
C 1.957792 -1.870728 -2.805152  
C 1.792526 -0.646662 -3.577052  
C 0.402976 -0.573911 -4.012762  
C -0.276825 0.662353 -4.012219  
C -1.681229 0.725197 -3.625684  
C -2.382481 -0.449407 -3.279526  
C -3.384574 -0.423065 -2.226355  
C -3.261130 -1.655714 -1.461369  
C -2.102717 -2.386065 -1.949653  
C -1.188279 -3.026973 -1.048571  
C 0.240646 -3.073033 -1.412390  
C 0.651696 -2.493891 -2.655093  
C -0.280311 -1.751601 -3.483902  
C -1.631862 -1.697296 -3.138894  
La -0.049796 -0.031991 2.142879  
C -0.803975 -0.393387 -6.940763  
H -1.318046 -0.636599 -7.902405  
H -1.495934 -0.752869 -6.146572  
C 0.557254 -1.032876 -6.892415  
H 0.732896 -2.117162 -6.906497  
C 1.510670 -0.047966 -6.888857  
H 2.598963 -0.202565 -6.874123  
C -0.504331 1.078900 -6.860056

H -1.269667 1.866814 -6.849674  
 C 0.855164 1.256334 -6.868340  
 H 1.380733 2.221476 -6.837361

C 0.886862 -1.486154 4.785299  
 C -0.265463 -0.768310 5.284774  
 C -1.598381 -0.937680 4.729097

**31. TS for Type A [6,6] 61-62  
 concerted mechanism addition  
 between La@C<sub>2</sub>-C<sub>72</sub> and CP**

Energy = -3371.89819425

NIMAG = 1  $\tilde{v}$  = -246.30

C -3.968173 0.766428 0.559382  
 C -3.992720 -0.455594 1.270612  
 C -3.512500 -0.522054 2.629764  
 C -2.847454 -1.819632 2.799726  
 C -1.829314 -2.012640 3.782746  
 C -0.699978 -2.835468 3.393007  
 C 0.650221 -2.550388 3.865037  
 C 1.570238 -2.789907 2.783724  
 C 2.722931 -1.946634 2.557495  
 C 3.244258 -1.957708 1.227529  
 C 3.911967 -0.797006 0.668008  
 C 3.687711 -0.774805 -0.765988  
 C 3.415589 0.448160 -1.431480  
 C 2.455928 0.497627 -2.519808  
 C 1.689758 1.747160 -2.372245  
 C 0.355607 1.804924 -2.757058  
 C -0.596052 2.515171 -1.936082  
 C -1.896055 1.903406 -2.148354  
 C -2.876179 1.941869 -1.142592  
 C -3.696902 0.774212 -0.866693  
 C -3.318406 1.914282 1.163973  
 C -2.583877 2.609102 0.106188  
 C -1.289658 3.168479 0.346701  
 C -0.232587 3.081276 -0.670773  
 C 1.178603 3.029609 -0.264008  
 C 2.118471 2.402793 -1.151540  
 C 3.260084 1.660857 -0.641626  
 C 3.530044 1.644249 0.736812  
 C 3.912799 0.409301 1.405813  
 C 3.389686 0.446911 2.749986  
 C 2.864478 -0.729636 3.383255  
 C 1.942822 -0.519603 4.491308

C -2.122121 0.406155 4.436376  
 C -3.008022 0.640387 3.304176  
 C -2.840417 1.874872 2.509848  
 C -1.696710 2.713507 2.791223  
 C -0.903200 3.282198 1.718356  
 C 0.478272 3.273230 2.121848  
 C 1.528418 3.083517 1.163490  
 C 2.710128 2.416777 1.638210  
 C 2.718839 1.740788 2.926315  
 C 1.669663 1.912732 3.880361  
 C 1.409345 0.817870 4.795536  
 C 0.059582 0.637110 5.304876  
 C -1.076279 1.365655 4.783911  
 C -0.811181 2.449634 3.895413  
 C 0.553252 2.744539 3.473029  
 C -3.589254 -1.676236 0.587972  
 C -2.797885 -2.467871 1.497994  
 C -1.600947 -3.123322 1.046369  
 C -0.581729 -3.334003 2.033274  
 C 0.811659 -3.334077 1.673726  
 C 1.242132 -3.191458 0.317920  
 C 2.543954 -2.629128 0.131798  
 C 2.876788 -1.935650 -1.092013  
 C 1.928189 -1.874067 -2.126981  
 C 1.763942 -0.661652 -2.906137  
 C 0.386846 -0.612052 -3.434974  
 C -0.313434 0.671237 -3.439237  
 C -1.707453 0.708747 -2.951471  
 C -2.409700 -0.459768 -2.605826  
 C -3.405167 -0.433789 -1.548704  
 C -3.275659 -1.663760 -0.781437  
 C -2.118573 -2.394808 -1.270865  
 C -1.206213 -3.038959 -0.367963  
 C 0.218136 -3.082083 -0.731346  
 C 0.622834 -2.490934 -1.971743  
 C -0.303613 -1.759303 -2.807519  
 C -1.650867 -1.710867 -2.462267  
 La -0.062959 -0.041094 2.815135  
 C -0.813654 -0.391221 -5.846556  
 H -1.100129 -0.515802 -6.920033

H -1.639901 -0.810179 -5.240550  
 C 0.544783 -1.019292 -5.649582  
 H 0.726971 -2.102989 -5.678283  
 C 1.509789 -0.027974 -5.924512  
 H 2.592025 -0.200161 -6.005950  
 C -0.489255 1.066965 -5.617065  
 H -1.240575 1.869154 -5.645658  
 C 0.883562 1.238947 -5.902593  
 H 1.401431 2.205883 -5.969882

C 3.300677 1.673894 -1.672623  
 C 3.577314 1.664071 -0.294716  
 C 3.961601 0.431075 0.377069  
 C 3.438457 0.470935 1.720609  
 C 2.912105 -0.704776 2.356309  
 C 1.990388 -0.491894 3.463234  
 C 0.933043 -1.456917 3.758036  
 C -0.218889 -0.737353 4.255939  
 C -1.551746 -0.905936 3.699586  
 C -2.074281 0.438767 3.405754  
 C -2.959044 0.673746 2.273429  
 C -2.791255 1.908043 1.479510  
 C -1.646647 2.745775 1.761235  
 C -0.852212 3.312377 0.687973  
 C 0.529561 3.300625 1.090654  
 C 1.579373 3.107400 0.132755  
 C 2.760074 2.439436 0.606471  
 C 2.768498 1.765491 1.895650  
 C 1.719820 1.940295 2.849780  
 C 1.458067 0.846858 3.766232  
 C 0.107703 0.667855 4.275198  
 C -1.027448 1.397455 3.754020  
 C -0.760914 2.480604 2.864770  
 C 0.604088 2.773221 2.442186  
 C -3.536360 -1.642411 -0.444082  
 C -2.748680 -2.435550 0.467894  
 C -1.552492 -3.093976 0.020157  
 C -0.534839 -3.306691 1.007877  
 C 0.859296 -3.310339 0.650278  
 C 1.290579 -3.166248 -0.704956  
 C 2.593767 -2.607561 -0.891172  
 C 2.927984 -1.915675 -2.115058  
 C 1.977894 -1.843798 -3.149402  
 C 1.828051 -0.651736 -3.944535  
 C 0.475877 -0.655782 -4.640704  
 C -0.287914 0.766550 -4.637418  
 C -1.665675 0.742536 -3.988005  
 C -2.355272 -0.420378 -3.640577  
 C -3.346357 -0.398060 -2.580235  
 C -3.214220 -1.624899 -1.812035  
 C -2.055418 -2.352162 -2.297773  
 C -1.152540 -3.004375 -1.392056  
 C 0.266761 -3.047377 -1.751090

### 32. P for Type A [6,6] 61-62 concerted mechanism addition between La@C<sub>2</sub>-C<sub>72</sub> and Cp

Energy = -3371.93530662

NIMAG = 0  $\tilde{\nu}$  = 62.61

C -3.920355 0.800002 -0.472308  
 C -3.942507 -0.422569 0.238732  
 C -3.463615 -0.489064 1.597649  
 C -2.799455 -1.786959 1.769051  
 C -1.782769 -1.981010 2.753636  
 C -0.654013 -2.806094 2.366535  
 C 0.696226 -2.522147 2.839243  
 C 1.617750 -2.765719 1.760274  
 C 2.770992 -1.923192 1.533236  
 C 3.294198 -1.936752 0.203488  
 C 3.963313 -0.777178 -0.358235  
 C 3.738291 -0.757685 -1.791647  
 C 3.457563 0.462167 -2.460125  
 C 2.502288 0.505972 -3.552473  
 C 1.727539 1.759434 -3.405892  
 C 0.402536 1.833000 -3.796791  
 C -0.539127 2.521672 -2.960807  
 C -1.843185 1.920499 -3.175504  
 C -2.826992 1.971617 -2.171642  
 C -3.648240 0.808576 -1.897515  
 C -3.270075 1.947868 0.133611  
 C -2.534134 2.639805 -0.923988  
 C -1.238424 3.195158 -0.683297  
 C -0.180704 3.097521 -1.696871  
 C 1.226319 3.046194 -1.293537  
 C 2.158409 2.411147 -2.182280

C 0.666560 -2.446556 -2.991069  
 C -0.247671 -1.738241 -3.842801  
 C -1.584208 -1.676133 -3.492293  
 La -0.014995 -0.010243 1.788655  
 C -0.719373 -0.341802 -6.730175  
 H -0.791213 -0.373776 -7.835275  
 H -1.626799 -0.793660 -6.281058  
 C 0.601272 -0.946591 -6.212391  
 H 0.803136 -2.013595 -6.417602  
 C 1.611746 0.061535 -6.735226  
 H 2.667681 -0.157114 -6.947104  
 C -0.401025 1.074012 -6.203362  
 H -1.128648 1.880115 -6.409429  
 C 1.012639 1.275090 -6.718928  
 H 1.476421 2.251014 -6.919297

C -3.477390 2.117548 -0.287225  
 C -2.739790 2.799036 -1.353741  
 C -1.436189 3.339713 -1.124010  
 C -0.389585 3.238617 -2.152308  
 C 1.028346 3.164637 -1.747989  
 C 1.959263 2.527899 -2.633453  
 C 3.093952 1.773428 -2.127127  
 C 3.367786 1.754133 -0.750210  
 C 3.733123 0.514528 -0.080447  
 C 3.216559 0.563865 1.266758  
 C 2.674978 -0.601058 1.902553  
 C 1.764612 -0.374799 3.014519  
 C 0.704191 -1.329741 3.326728  
 C -0.438143 -0.591960 3.826676  
 C -1.776804 -0.743353 3.280009  
 C -2.283436 0.606395 2.985012  
 C -3.173908 0.848714 1.857183  
 C -2.992621 2.077284 1.056016  
 C -1.834975 2.900155 1.325490  
 C -1.039871 3.451951 0.245213  
 C 0.342983 3.426867 0.641654  
 C 1.385088 3.218816 -0.321165  
 C 2.560951 2.539740 0.151537  
 C 2.567653 1.869059 1.442796  
 C 1.524438 2.057892 2.399426  
 C 1.253718 0.968732 3.317858  
 C -0.094149 0.809228 3.839507  
 C -1.222424 1.552319 3.321394  
 C -0.947337 2.629157 2.426735  
 C 0.418079 2.903401 1.995017  
 C -3.810245 -1.470838 -0.844024  
 C -3.022328 -2.268846 0.063241  
 C -1.836521 -2.940186 -0.395555  
 C -0.813586 -3.160478 0.584181  
 C 0.576426 -3.180589 0.215598  
 C 1.000883 -3.051099 -1.143404  
 C 2.309487 -2.508741 -1.339449  
 C 2.642314 -1.827706 -2.568916  
 C 1.697451 -1.769518 -3.605380  
 C 1.543776 -0.546106 -4.383112  
 C 0.149688 -0.452237 -4.794637  
 C -0.511871 0.790237 -4.792679  
 C -1.914004 0.878626 -4.407900

### 33. RC for Type D [5,6] 33-32 stepwise addition between La@C<sub>2</sub>-C<sub>72</sub> and Cp

Energy = -3371.90195800

NIMAG = 0  $\tilde{\nu}$  = 14.16

C -4.146746 0.977544 -0.880586  
 C -4.188705 -0.240345 -0.164741  
 C -3.700471 -0.308615 1.192487  
 C -3.054493 -1.615186 1.363293  
 C -2.031341 -1.817860 2.339273  
 C -0.914921 -2.654001 1.942934  
 C 0.440095 -2.385200 2.403427  
 C 1.349600 -2.644291 1.320036  
 C 2.514478 -1.820006 1.085289  
 C 3.026433 -1.842441 -0.248733  
 C 3.706955 -0.694221 -0.813330  
 C 3.468631 -0.670621 -2.246840  
 C 3.220158 0.552689 -2.910422  
 C 2.246371 0.612480 -3.989437  
 C 1.511647 1.866458 -3.847740  
 C 0.172539 1.952164 -4.234259  
 C -0.773278 2.692465 -3.418295  
 C -2.083373 2.091451 -3.616984  
 C -3.048553 2.135264 -2.598834  
 C -3.881081 0.974156 -2.309423

C -2.624318 -0.285100 -4.044541  
 C -3.619371 -0.240028 -2.984425  
 C -3.508915 -1.471282 -2.215373  
 C -2.364142 -2.218723 -2.709289  
 C -1.451118 -2.867316 -1.814130  
 C -0.025220 -2.935849 -2.190844  
 C 0.383671 -2.372976 -3.441429  
 C -0.545817 -1.621655 -4.266161  
 C -1.892374 -1.541026 -3.905393  
 La -0.243519 0.120602 1.352422  
 C 2.637208 -1.339476 6.021911  
 C 3.881840 -1.040547 5.229768  
 C 4.150122 -2.101078 4.409921  
 C 2.205311 -2.689278 5.512150  
 C 3.113445 -3.123240 4.586145  
 H 2.849939 -1.369753 7.117591  
 H 1.851364 -0.557631 5.904012  
 H 4.468536 -0.116360 5.323409  
 H 4.996996 -2.183481 3.713460  
 H 1.317477 -3.230254 5.866997  
 H 3.077117 -4.077375 4.040788

C 1.267363 2.015854 -4.043663  
 C -0.079582 2.091839 -4.405477  
 C -1.015491 2.823229 -3.571252  
 C -2.325006 2.211861 -3.747738  
 C -3.269553 2.245513 -2.710568  
 C -4.089530 1.077647 -2.408564  
 C -3.655858 2.219951 -0.393145  
 C -2.944403 2.911251 -1.471089  
 C -1.641840 3.465300 -1.264431  
 C -0.613490 3.371591 -2.312408  
 C 0.812781 3.307331 -1.934330  
 C 1.731338 2.678528 -2.836970  
 C 2.882366 1.931698 -2.352512  
 C 3.181065 1.913548 -0.981257  
 C 3.566003 0.674147 -0.319315  
 C 3.071699 0.716966 1.037699  
 C 2.558711 -0.454161 1.691614  
 C 1.685391 -0.245021 2.833375  
 C 0.677480 -1.281202 3.280328  
 C -0.521511 -0.486946 3.670107  
 C -1.863647 -0.642749 3.146171  
 C -2.385321 0.704524 2.849565  
 C -3.300004 0.945506 1.741149  
 C -3.142840 2.178871 0.938966  
 C -1.990984 3.015271 1.188456  
 C -1.221751 3.583147 0.096517  
 C 0.169275 3.564603 0.466322  
 C 1.195282 3.363618 -0.513712  
 C 2.385921 2.692339 -0.064739  
 C 2.417464 2.012864 1.221959  
 C 1.383342 2.181186 2.189851  
 C 1.142733 1.084922 3.104804  
 C -0.189740 0.912326 3.655037  
 C -1.324120 1.652167 3.155922  
 C -1.078729 2.739921 2.266494  
 C 0.271242 3.028489 1.812974  
 C -3.974990 -1.368173 -0.949352  
 C -3.168062 -2.163316 -0.056566  
 C -1.982838 -2.815841 -0.538667  
 C -0.937114 -3.012256 0.420987  
 C 0.440411 -3.021054 0.029853  
 C 0.842642 -2.901140 -1.336135  
 C 2.145916 -2.357691 -1.553760

### 34. TS1 for Type D [5,6] 33-32 stepwise addition between La@C<sub>2</sub>- C<sub>72</sub> and Cp

Energy = -3371.89028860

NIMAG = 1  $\tilde{\nu}$  = -437.43

C -4.330319 1.076806 -0.975805  
 C -4.351477 -0.141752 -0.260415  
 C -3.841166 -0.210341 1.088406  
 C -3.181774 -1.513527 1.248041  
 C -2.147076 -1.714694 2.209185  
 C -1.016015 -2.516809 1.786763  
 C 0.335760 -2.235356 2.222068  
 C 1.225004 -2.485521 1.127719  
 C 2.396241 -1.671719 0.871773  
 C 2.877278 -1.689092 -0.472137  
 C 3.536730 -0.532124 -1.051900  
 C 3.273681 -0.509007 -2.480570  
 C 3.003526 0.713768 -3.138610  
 C 2.009066 0.767413 -4.199643

C 2.449068 -1.671130 -2.787767  
 C 1.485731 -1.619704 -3.808016  
 C 1.308001 -0.395264 -4.580707  
 C -0.093938 -0.311931 -4.967972  
 C -0.765566 0.925290 -4.952973  
 C -2.160931 1.002198 -4.543515  
 C -2.856551 -0.168088 -4.169344  
 C -3.831992 -0.132453 -3.091846  
 C -3.698649 -1.364837 -2.325771  
 C -2.557278 -2.102041 -2.841721  
 C -1.622561 -2.742371 -1.963139  
 C -0.202653 -2.798402 -2.364475  
 C 0.179800 -2.232416 -3.622127  
 C -0.770456 -1.487349 -4.428770  
 C -2.111461 -1.417811 -4.043991  
 La -0.394430 0.167195 1.174241  
 C 2.046252 -1.042109 5.606378  
 C 3.419405 -0.902198 5.018908  
 C 3.734813 -2.059075 4.321013  
 C 1.476828 -2.223845 4.832691  
 C 2.591280 -2.909392 4.274880  
 H 2.135523 -1.345654 6.678873  
 H 1.433321 -0.117786 5.601944  
 H 4.084062 -0.043948 5.188947  
 H 4.699913 -2.273091 3.840261  
 H 0.575748 -2.754442 5.177499  
 H 2.545245 -3.883845 3.769124

C 2.630693 -1.783820 1.028994  
 C 3.094494 -1.799808 -0.314804  
 C 3.751423 -0.637761 -0.907488  
 C 3.482429 -0.620534 -2.332575  
 C 3.205110 0.600130 -2.994672  
 C 2.201926 0.647793 -4.048682  
 C 1.457111 1.894965 -3.892760  
 C 0.106779 1.965637 -4.245627  
 C -0.824390 2.696166 -3.407371  
 C -2.134685 2.079609 -3.573779  
 C -3.069244 2.113379 -2.529366  
 C -3.888387 0.944741 -2.219422  
 C -3.440389 2.094109 -0.212382  
 C -2.740106 2.787687 -1.296191  
 C -1.438004 3.347288 -1.099610  
 C -0.416521 3.250981 -2.154336  
 C 1.013106 3.190105 -1.785239  
 C 1.925283 2.560469 -2.690873  
 C 3.084792 1.817523 -2.211569  
 C 3.390173 1.805080 -0.843052  
 C 3.782205 0.565451 -0.178118  
 C 3.293936 0.608654 1.183118  
 C 2.795166 -0.564649 1.855316  
 C 1.923755 -0.358756 2.983628  
 C 0.959945 -1.456623 3.557906  
 C -0.286680 -0.608511 3.853618  
 C -1.623088 -0.763305 3.335927  
 C -2.149099 0.584571 3.025844  
 C -3.068288 0.823009 1.922344  
 C -2.918904 2.057722 1.114442  
 C -1.767950 2.899264 1.353956  
 C -1.008712 3.472827 0.257021  
 C 0.384563 3.453823 0.617794  
 C 1.405293 3.251070 -0.366036  
 C 2.601025 2.584300 0.074384  
 C 2.632549 1.892978 1.358094  
 C 1.603289 2.057565 2.328601  
 C 1.374792 0.954546 3.240425  
 C 0.045074 0.785630 3.804873  
 C -1.081701 1.528429 3.308735  
 C -0.847983 2.623843 2.423464  
 C 0.493825 2.913095 1.962812  
 C -3.755489 -1.494259 -0.754924

### 35. INT for Type D [5,6] 33-32 stepwise addition between La@C<sub>2</sub>- C<sub>72</sub> and Cp

Energy = -3371.89874166

NIMAG = 0  $\tilde{\nu}$  = 47.13

C -4.120805 0.948006 -0.787375  
 C -4.134620 -0.266904 -0.065894  
 C -3.619847 -0.331761 1.279393  
 C -2.948090 -1.633481 1.438758  
 C -1.919791 -1.839009 2.401382  
 C -0.776989 -2.624550 1.972157  
 C 0.571848 -2.337647 2.399926  
 C 1.451022 -2.581535 1.296714

|    |           |           |           |   |           |           |           |
|----|-----------|-----------|-----------|---|-----------|-----------|-----------|
| C  | -2.943417 | -2.286436 | 0.136038  | C | -3.847534 | -0.205305 | 1.064019  |
| C  | -1.758683 | -2.933811 | -0.351064 | C | -3.186236 | -1.506458 | 1.247851  |
| C  | -0.707160 | -3.113011 | 0.602782  | C | -2.169872 | -1.700553 | 2.227966  |
| C  | 0.665590  | -3.115590 | 0.202917  | C | -1.022299 | -2.491766 | 1.827716  |
| C  | 1.060968  | -3.012662 | -1.165534 | C | 0.319814  | -2.203380 | 2.279072  |
| C  | 2.362567  | -2.471810 | -1.391707 | C | 1.218593  | -2.456266 | 1.195655  |
| C  | 2.654643  | -1.784115 | -2.628863 | C | 2.400687  | -1.654557 | 0.939984  |
| C  | 1.687698  | -1.739658 | -3.643583 | C | 2.893277  | -1.691098 | -0.398206 |
| C  | 1.500901  | -0.516532 | -4.419436 | C | 3.560358  | -0.540294 | -0.988188 |
| C  | 0.096334  | -0.439801 | -4.798451 | C | 3.316591  | -0.535621 | -2.419850 |
| C  | -0.580107 | 0.795013  | -4.784477 | C | 3.052255  | 0.678885  | -3.096040 |
| C  | -1.972488 | 0.868264  | -4.366736 | C | 2.069189  | 0.718477  | -4.168166 |
| C  | -2.664240 | -0.302878 | -3.984966 | C | 1.323893  | 1.968178  | -4.036089 |
| C  | -3.632289 | -0.265956 | -2.902768 | C | -0.019374 | 2.037500  | -4.414194 |
| C  | -3.489469 | -1.495301 | -2.131341 | C | -0.964870 | 2.777327  | -3.599224 |
| C  | -2.348277 | -2.232113 | -2.652715 | C | -2.272380 | 2.161635  | -3.783612 |
| C  | -1.407453 | -2.866812 | -1.778243 | C | -3.226915 | 2.206320  | -2.756950 |
| C  | 0.010393  | -2.919940 | -2.187625 | C | -4.051323 | 1.041246  | -2.450979 |
| C  | 0.383575  | -2.355230 | -3.447890 | C | -3.639853 | 2.208080  | -0.445961 |
| C  | -0.572773 | -1.615521 | -4.250720 | C | -2.918013 | 2.889467  | -1.523411 |
| C  | -1.912624 | -1.549224 | -3.857712 | C | -1.618564 | 3.449329  | -1.308588 |
| La | -0.219737 | 0.019745  | 1.317545  | C | -0.578198 | 3.342615  | -2.343840 |
| C  | 2.160411  | -1.227294 | 5.824553  | C | 0.844604  | 3.284905  | -1.948900 |
| C  | 3.625374  | -1.183468 | 5.488002  | C | 1.772964  | 2.646293  | -2.833582 |
| C  | 3.958172  | -2.285292 | 4.689339  | C | 2.920127  | 1.905724  | -2.326163 |
| C  | 1.591977  | -2.239623 | 4.795109  | C | 3.201706  | 1.904966  | -0.952352 |
| C  | 2.803773  | -2.998309 | 4.341332  | C | 3.577322  | 0.671837  | -0.271098 |
| H  | 2.017843  | -1.620928 | 6.859533  | C | 3.066064  | 0.729619  | 1.080341  |
| H  | 1.658316  | -0.237184 | 5.805116  | C | 2.550442  | -0.431299 | 1.746319  |
| H  | 4.330081  | -0.435166 | 5.877667  | C | 1.717658  | -0.224488 | 2.928469  |
| H  | 4.978108  | -2.545845 | 4.369969  | C | 0.682256  | -1.314036 | 3.430595  |
| H  | 0.776818  | -2.880874 | 5.188626  | C | -0.557628 | -0.459236 | 3.693770  |
| H  | 2.765037  | -3.902853 | 3.719349  | C | -1.886673 | -0.617218 | 3.153773  |
|    |           |           |           | C | -2.405000 | 0.726990  | 2.826404  |
|    |           |           |           | C | -3.305419 | 0.955194  | 1.705816  |
|    |           |           |           | C | -3.139832 | 2.181409  | 0.889784  |
|    |           |           |           | C | -1.993634 | 3.024137  | 1.142810  |
|    |           |           |           | C | -1.213825 | 3.585199  | 0.054645  |
|    |           |           |           | C | 0.173539  | 3.567724  | 0.439933  |
|    |           |           |           | C | 1.211038  | 3.359149  | -0.524746 |
|    |           |           |           | C | 2.397320  | 2.694347  | -0.053330 |
|    |           |           |           | C | 2.413981  | 2.026639  | 1.240076  |
|    |           |           |           | C | 1.362662  | 2.189133  | 2.188319  |

### 36. TS2 for Type D [5,6] 33-32 stepwise addition between La@C<sub>2</sub>- C<sub>72</sub> and Cp

Energy = -3371.89609419

NIMAG = 1  $\tilde{\nu}$  = -200.65

|   |           |           |           |
|---|-----------|-----------|-----------|
| C | -4.309532 | 1.057300  | -1.022710 |
| C | -4.339030 | -0.151463 | -0.291897 |

C 1.118438 1.101053 3.110485  
 C -0.220524 0.932282 3.640735  
 C -1.343206 1.672445 3.123921  
 C -1.091364 2.754703 2.229774  
 C 0.259390 3.037859 1.790073  
 C -3.951830 -1.385632 -0.962455  
 C -3.156583 -2.170389 -0.049323  
 C -1.962713 -2.820939 -0.509043  
 C -0.927207 -2.991589 0.465050  
 C 0.452597 -2.999995 0.091358  
 C 0.872312 -2.909257 -1.271516  
 C 2.178708 -2.373998 -1.480692  
 C 2.494667 -1.701544 -2.720392  
 C 1.544263 -1.664349 -3.751944  
 C 1.373446 -0.449027 -4.542043  
 C -0.023808 -0.373157 -4.946683  
 C -0.697768 0.863095 -4.954282  
 C -2.097862 0.942818 -4.562549  
 C -2.797415 -0.223815 -4.182674  
 C -3.785544 -0.176209 -3.118386  
 C -3.659036 -1.398479 -2.334168  
 C -2.509600 -2.140704 -2.827773  
 C -1.585048 -2.766733 -1.929770  
 C -0.160064 -2.825382 -2.313094  
 C 0.236144 -2.275947 -3.573404  
 C -0.705053 -1.542673 -4.400368  
 C -2.051195 -1.470704 -4.032398  
 La -0.425736 0.142640 1.166385  
 C 1.924044 -0.939729 5.554333  
 C 3.200363 -0.747193 4.784802  
 C 3.578708 -2.004683 4.240147  
 C 1.292829 -2.077743 4.723299  
 C 2.483020 -2.856712 4.267309  
 H 2.149456 -1.309574 6.582321  
 H 1.291337 -0.036094 5.652879  
 H 3.849278 0.136996 4.858526  
 H 4.553936 -2.230392 3.785454  
 H 0.476559 -2.654421 5.197459  
 H 2.441726 -3.873412 3.853403

### 37. P for Type D [5,6] 33-32 stepwise addition between La@C<sub>2</sub>-C<sub>72</sub> and Cp

Energy = -3371.92031797

NIMAG = 0  $\tilde{\nu}$  = 58.73

C -4.103113 0.940331 -0.848868  
 C -4.136155 -0.271023 -0.122866  
 C -3.646700 -0.331888 1.234585  
 C -2.991797 -1.634191 1.417071  
 C -1.979968 -1.839525 2.402787  
 C -0.830067 -2.633852 2.006668  
 C 0.514147 -2.353682 2.469917  
 C 1.409981 -2.578227 1.376791  
 C 2.589114 -1.768345 1.117707  
 C 3.087942 -1.816785 -0.222694  
 C 3.760127 -0.674381 -0.806785  
 C 3.522666 -0.665635 -2.242384  
 C 3.261534 0.551416 -2.911565  
 C 2.280786 0.598020 -3.984070  
 C 1.537895 1.849144 -3.846280  
 C 0.195444 1.922902 -4.227932  
 C -0.749638 2.662113 -3.411561  
 C -2.058397 2.050387 -3.601185  
 C -3.016444 2.093831 -2.577566  
 C -3.842146 0.929302 -2.276758  
 C -3.432430 2.088568 -0.267622  
 C -2.706556 2.770272 -1.339999  
 C -1.405702 3.329357 -1.120924  
 C -0.363200 3.222341 -2.153884  
 C 1.058966 3.160150 -1.755749  
 C 1.987477 2.523850 -2.643193  
 C 3.129936 1.777294 -2.134801  
 C 3.411030 1.769721 -0.762291  
 C 3.779717 0.535293 -0.087995  
 C 3.273402 0.590726 1.267237  
 C 2.761015 -0.564093 1.919247  
 C 2.068400 -0.385958 3.275105  
 C 0.859460 -1.494740 3.648367  
 C -0.358801 -0.608042 3.862208  
 C -1.688825 -0.755764 3.323305  
 C -2.201886 0.590446 2.996574  
 C -3.098321 0.824509 1.878782  
 C -2.928535 2.054007 1.066996



|    |           |           |           |   |          |           |          |
|----|-----------|-----------|-----------|---|----------|-----------|----------|
| C  | -1.786499 | 2.896441  | 1.324143  | H | 4.653647 | -2.227380 | 3.769344 |
| C  | -1.004283 | 3.460106  | 0.242838  | H | 0.697822 | -2.762049 | 5.485640 |
| C  | 0.386262  | 3.431897  | 0.630790  | H | 2.739939 | -4.033098 | 4.293705 |
| C  | 1.422419  | 3.228647  | -0.332111 |   |          |           |          |
| C  | 2.605771  | 2.555355  | 0.147441  |   |          |           |          |
| C  | 2.641574  | 1.906534  | 1.443011  |   |          |           |          |
| C  | 1.571753  | 2.039851  | 2.381711  |   |          |           |          |
| C  | 1.329432  | 0.968598  | 3.309258  |   |          |           |          |
| C  | -0.006185 | 0.776070  | 3.791495  |   |          |           |          |
| C  | -1.134396 | 1.525929  | 3.290300  |   |          |           |          |
| C  | -0.878020 | 2.606280  | 2.404760  |   |          |           |          |
| C  | 0.471749  | 2.890518  | 1.973810  |   |          |           |          |
| C  | -3.753954 | -1.504373 | -0.796824 |   |          |           |          |
| C  | -2.961672 | -2.292915 | 0.115272  |   |          |           |          |
| C  | -1.765634 | -2.937362 | -0.343004 |   |          |           |          |
| C  | -0.731620 | -3.105395 | 0.635296  |   |          |           |          |
| C  | 0.647005  | -3.104715 | 0.264250  |   |          |           |          |
| C  | 1.069029  | -3.023230 | -1.100505 |   |          |           |          |
| C  | 2.376443  | -2.497237 | -1.307662 |   |          |           |          |
| C  | 2.699907  | -1.828540 | -2.547956 |   |          |           |          |
| C  | 1.749736  | -1.785459 | -3.580114 |   |          |           |          |
| C  | 1.582975  | -0.566877 | -4.365286 |   |          |           |          |
| C  | 0.186839  | -0.485722 | -4.771429 |   |          |           |          |
| C  | -0.483867 | 0.752547  | -4.773400 |   |          |           |          |
| C  | -1.885245 | 0.834502  | -4.384868 |   |          |           |          |
| C  | -2.587137 | -0.331923 | -4.009916 |   |          |           |          |
| C  | -3.579099 | -0.287051 | -2.948567 |   |          |           |          |
| C  | -3.456848 | -1.511354 | -2.168904 |   |          |           |          |
| C  | -2.306967 | -2.252856 | -2.662113 |   |          |           |          |
| C  | -1.384609 | -2.879911 | -1.762581 |   |          |           |          |
| C  | 0.040360  | -2.939884 | -2.143808 |   |          |           |          |
| C  | 0.440097  | -2.394058 | -3.405144 |   |          |           |          |
| C  | -0.498633 | -1.655601 | -4.230705 |   |          |           |          |
| C  | -1.845089 | -1.582426 | -3.865689 |   |          |           |          |
| La | -0.233226 | -0.056335 | 1.322053  |   |          |           |          |
| C  | 2.108790  | -0.975350 | 5.641111  |   |          |           |          |
| C  | 3.080369  | -0.663163 | 4.484239  |   |          |           |          |
| C  | 3.667854  | -2.040097 | 4.217431  |   |          |           |          |
| C  | 1.466204  | -2.189439 | 4.933964  |   |          |           |          |
| C  | 2.700689  | -2.950811 | 4.479554  |   |          |           |          |
| H  | 2.646872  | -1.265911 | 6.564810  |   |          |           |          |
| H  | 1.397680  | -0.156607 | 5.868205  |   |          |           |          |
| H  | 3.791849  | 0.173779  | 4.610018  |   |          |           |          |
